# Supplementary material
Source: PubMed Central journal article supplement (PMC3501215)

# Supporting Information

## Spectra

### **Stereoselective *C*-Glycoside Formation with 2-*O*-Benzyl-4,6-*O*-BenzylideneProtected 3-Deoxy Gluco- and Mannopyranoside Donors: Comparison with *O*-Glycoside Formation**

*Myriame Moumé-Pymbock, and David Crich\**

Department of Chemistry, Wayne State University, 5101 Cass Avenue,  
Detroit, MI, 48202

## Table of contents

|                                                                                                                                                       | <sup>1</sup> H | <sup>13</sup> C |
|-------------------------------------------------------------------------------------------------------------------------------------------------------|----------------|-----------------|
| 2,3- <i>O</i> -Di-benzyl-4,6- <i>O</i> -benzylidene-1-allyl-1-deoxy-β-D-mannopyranose( <b>5</b> )                                                     | S-3            | S-4             |
| 2,3-Di- <i>O</i> -benzyl-4,6- <i>O</i> -benzylidene-1-deoxy-1-(2-oxo-2-phenylethyl)-β-D-mannopyranose( <b>6</b> )                                     | S-5            | S-6             |
| 2,3- <i>O</i> -Di-benzyl-4,6- <i>O</i> -benzylidene-1-allyl-1-deoxy-α-D-glucopyranose ( <b>7</b> )                                                    | S-7            | S-8             |
| 2,3-Di- <i>O</i> -benzyl-4,6- <i>O</i> -benzylidene-1-(2-oxo-2-phenylethyl)-α-D-glucopyranose ( <b>8</b> )                                            | S-9            | S-10            |
| [(1 <i>R</i> )-2-Oxo-1,2-diphenyl-1-(phenylthiomethyl)ethyl] 2,3-di- <i>O</i> -benzyl-4,6- <i>O</i> -benzylidene-α-D-glucopyranoside ( <b>9</b> )     | S-11           | S-12            |
| 2- <i>O</i> -Benzyl-4,6- <i>O</i> -benzylidene-1-allyl-1,3-dideoxy- β-D-mannopyranose ( <b>10</b> )                                                   | S-13           | S-14            |
| S-Phenyl 2- <i>O</i> -Benzyl-4,6- <i>O</i> -benzylidene-3-deoxy-α-D-thio-mannopyranoside ( <b>3α</b> )                                                | S-15           | S-16            |
| 2- <i>O</i> -Benzyl-4,6- <i>O</i> -benzylidene-1,3-dideoxy-1-(2-oxo-2-phenylethyl)-β-D-mannopyranose ( <b>11</b> )                                    | S-17           | S-18            |
| 2- <i>O</i> -Benzyl-4,6- <i>O</i> -benzylidene-1-allyl-1,3-dideoxy-α-D-glucopyranose( <b>12</b> )                                                     | S-19           | S-20            |
| 2- <i>O</i> -Benzyl-4,6- <i>O</i> -benzylidene-3-deoxy-1-(2-oxo-2-phenylethyl)-α-D-glucopyranose( <b>13</b> )                                         | S-21           | S-22            |
| [(1 <i>R</i> )-2-Oxo-1,2-diphenyl-1-(phenylthiomethyl)ethyl] 2- <i>O</i> -benzyl-4,6- <i>O</i> -benzylidene-3-deoxy-α-D-glucopyranoside ( <b>14</b> ) | S-23           | S-24            |

$^1\text{H-NMR}$  ( $\text{CDCl}_3$ , 500 MHz) of 2,3-*O*-Di-benzyl-4,6-*O*-benzylidene-1-allyl-1-deoxy- $\beta$ -D-mannopyranose(**5**)

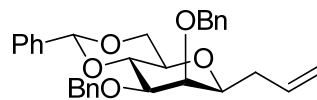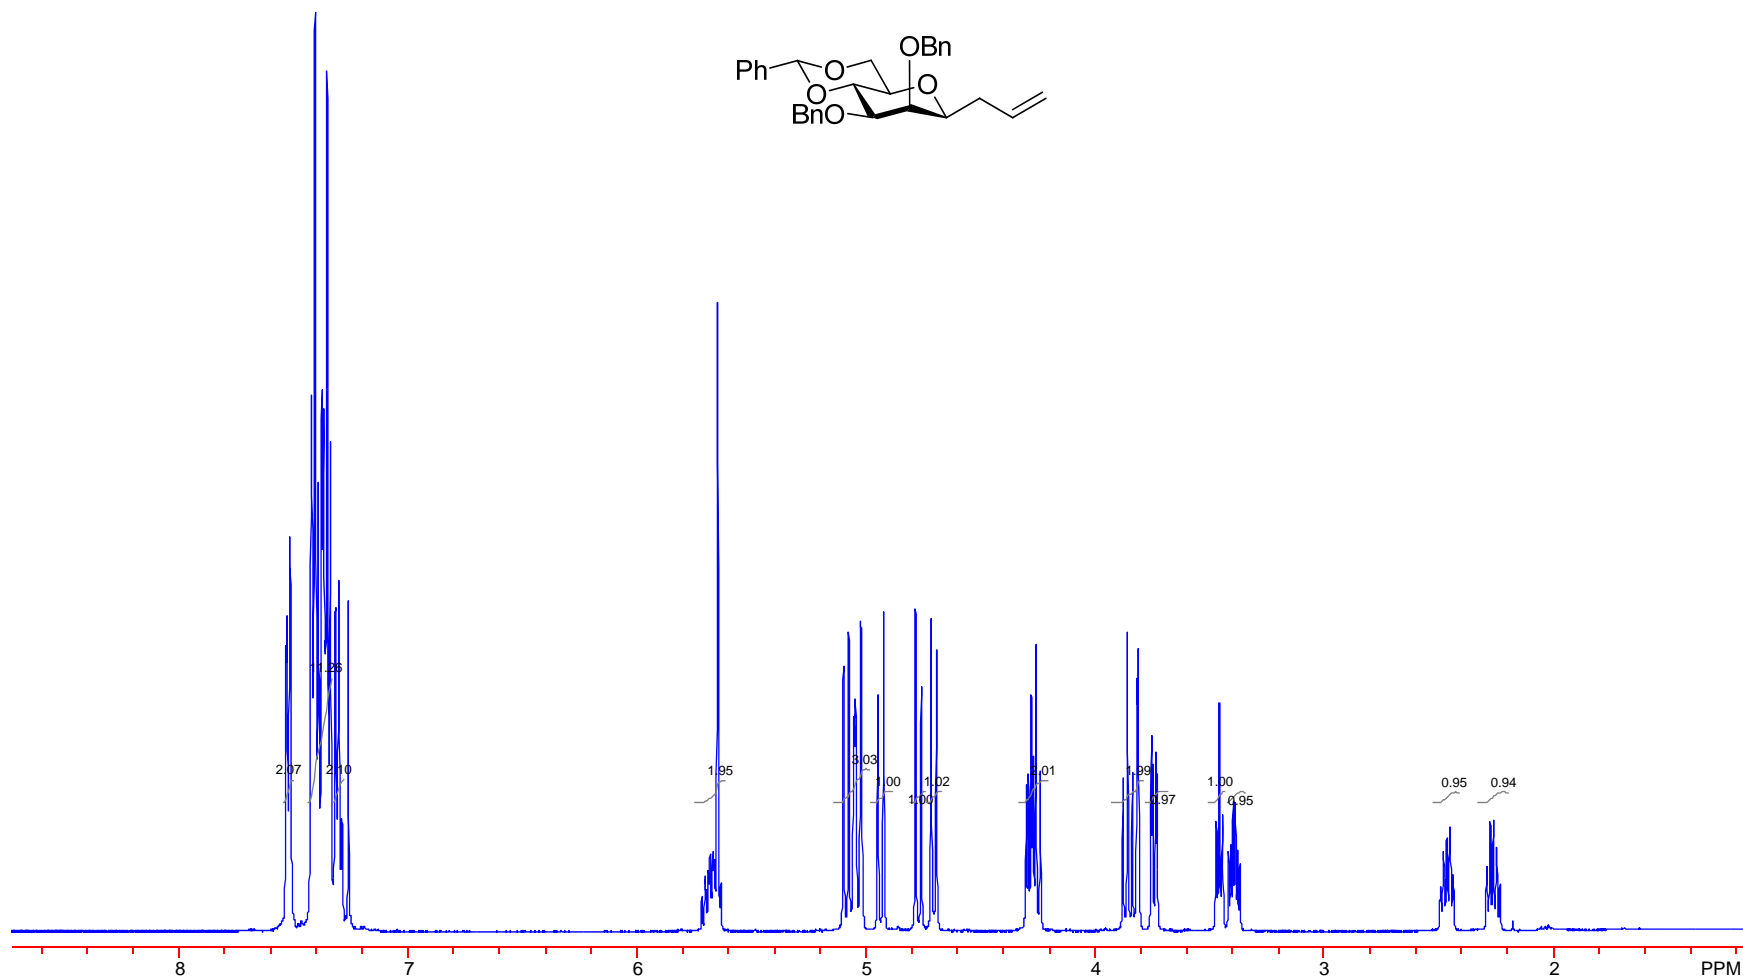

$^{13}\text{C}$ -NMR ( $\text{CDCl}_3$ , 125 MHz) of 2,3-*O*-Di-benzyl-4,6-*O*-benzylidene-1-allyl-1-deoxy- $\beta$ -D-mannopyranose(**5**)

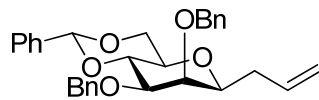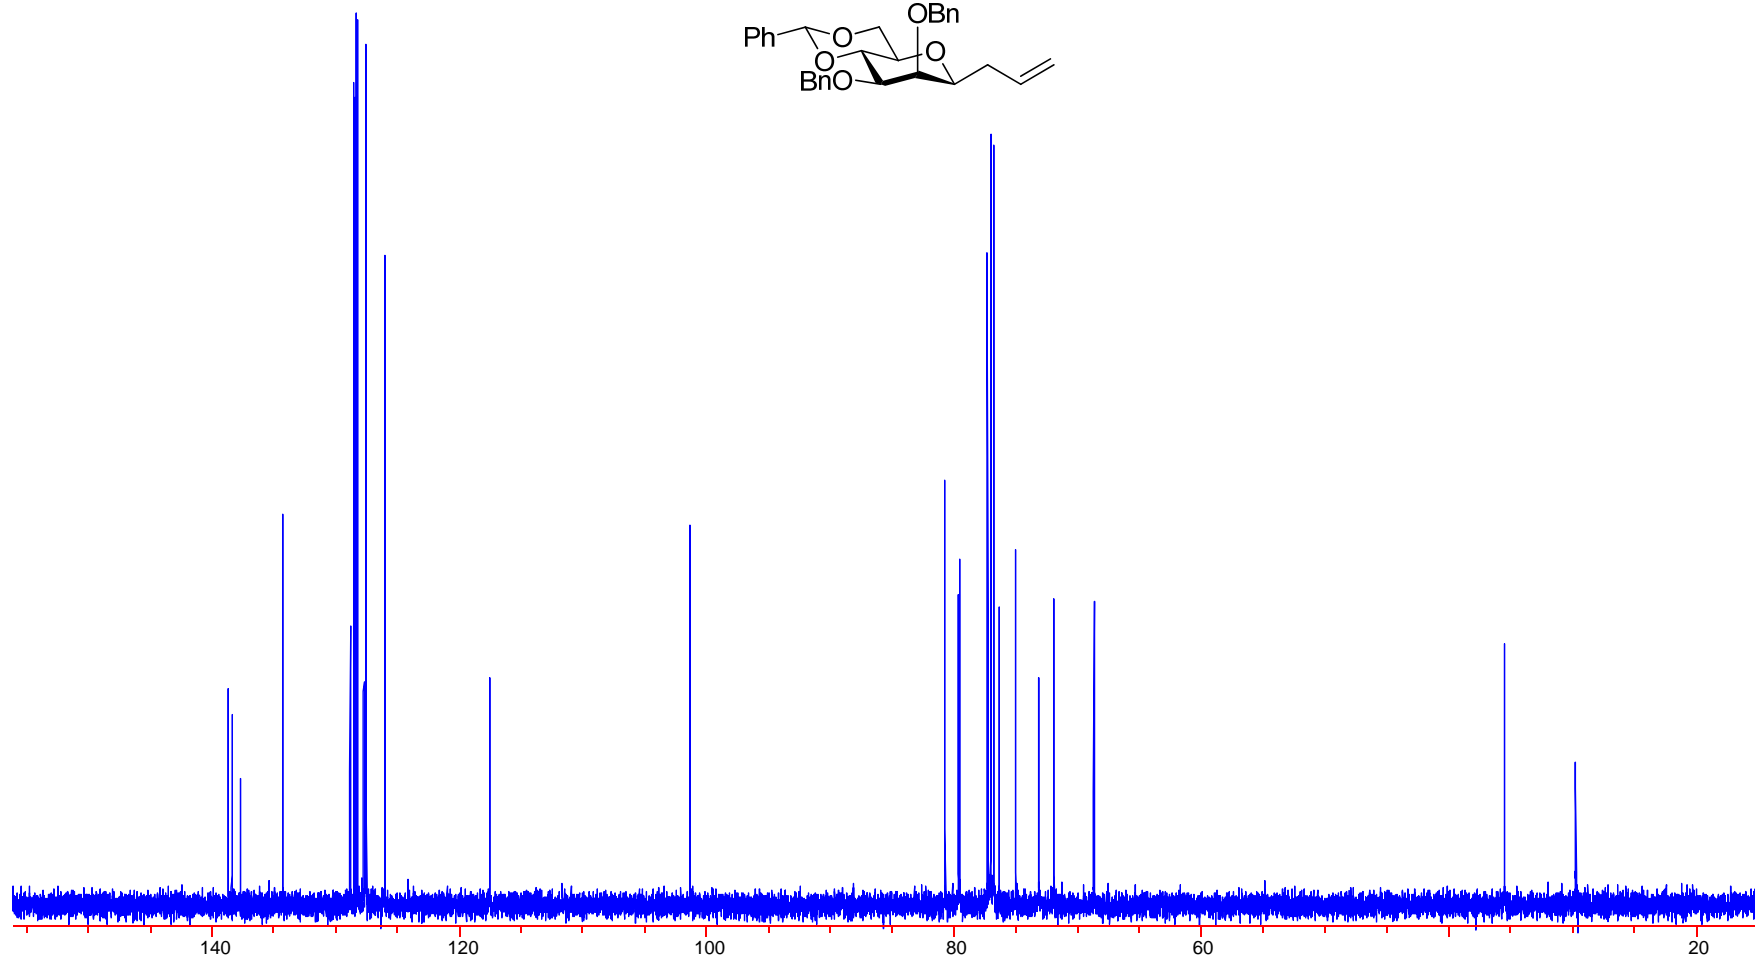

$^1\text{H-NMR}$  ( $\text{CDCl}_3$ , 500 MHz) of 2,3-Di-*O*-benzyl-4,6-*O*-benzylidene-1-deoxy-1-(2-oxo-2-phenylethyl)- $\beta$ -D-mannopyranose(**6**)

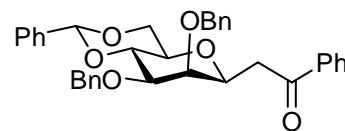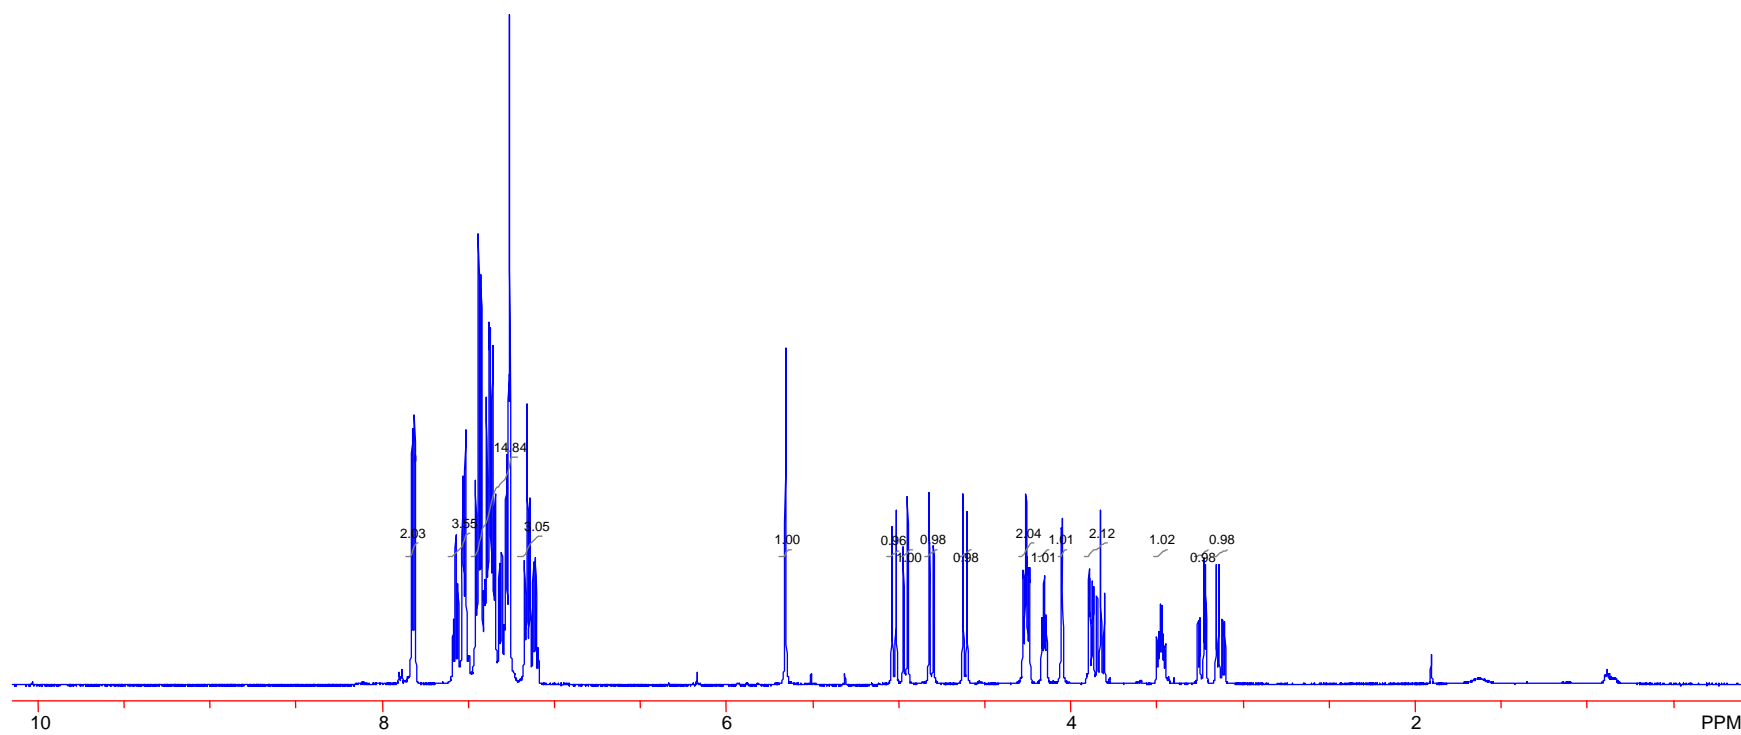

$^{13}\text{C-NMR}$  ( $\text{CDCl}_3$ , 125 MHz) of 2,3-Di-*O*-benzyl-4,6-*O*-benzylidene-1-deoxy-1-(2-oxo-2-phenylethyl)- $\beta$ -D-mannopyranose(**6**)

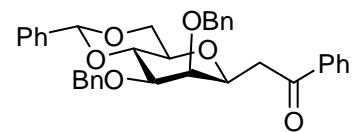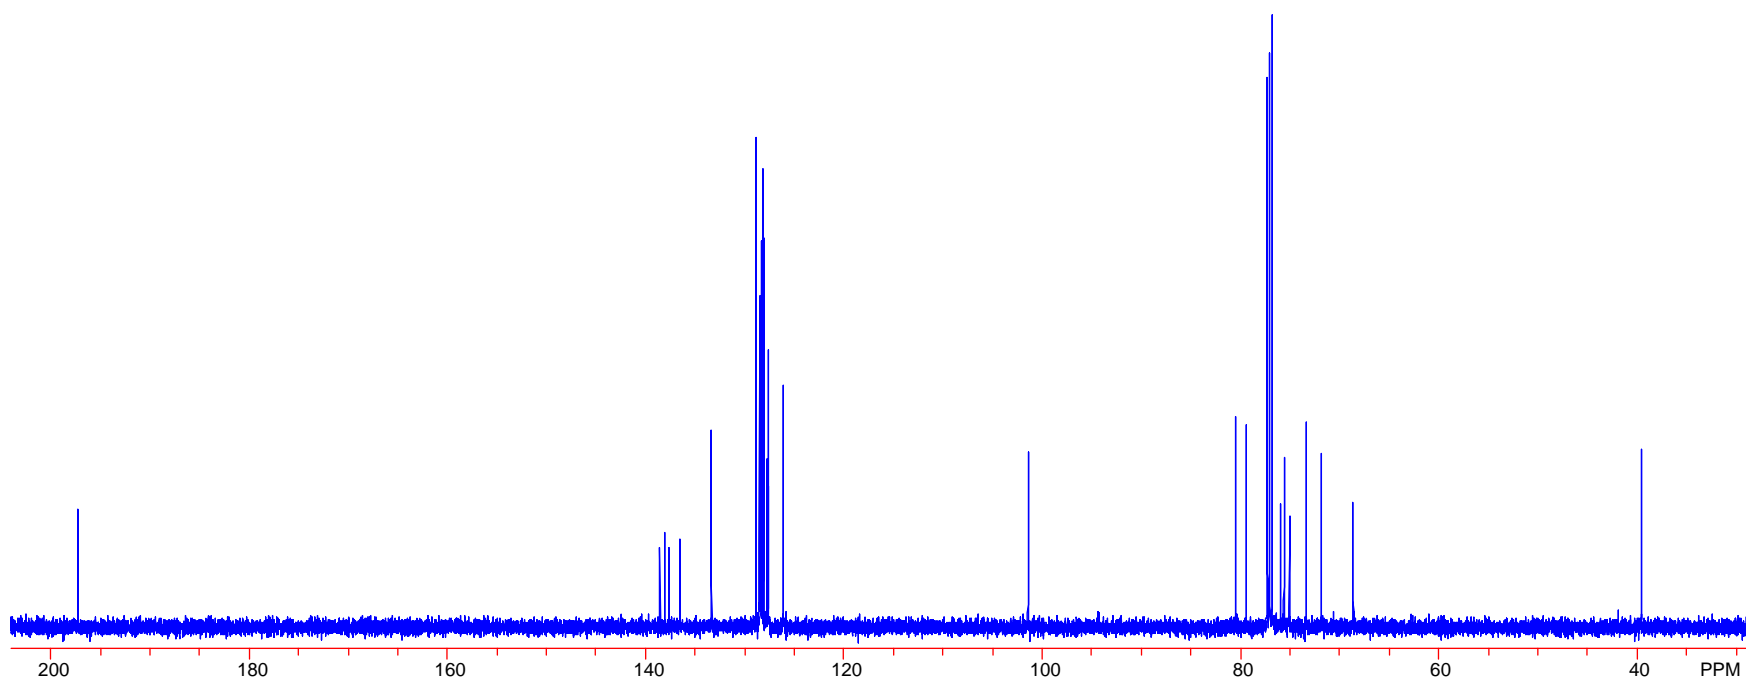

$^1\text{H-NMR}$  ( $\text{CDCl}_3$ ,

500 MHz) of 2,3-*O*-Di-benzyl-4,6-*O*-benzylidene-1-allyl-1-deoxy- $\alpha$ -D-glucopyranose (**7**)

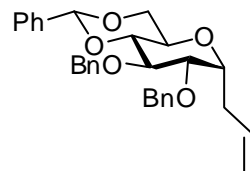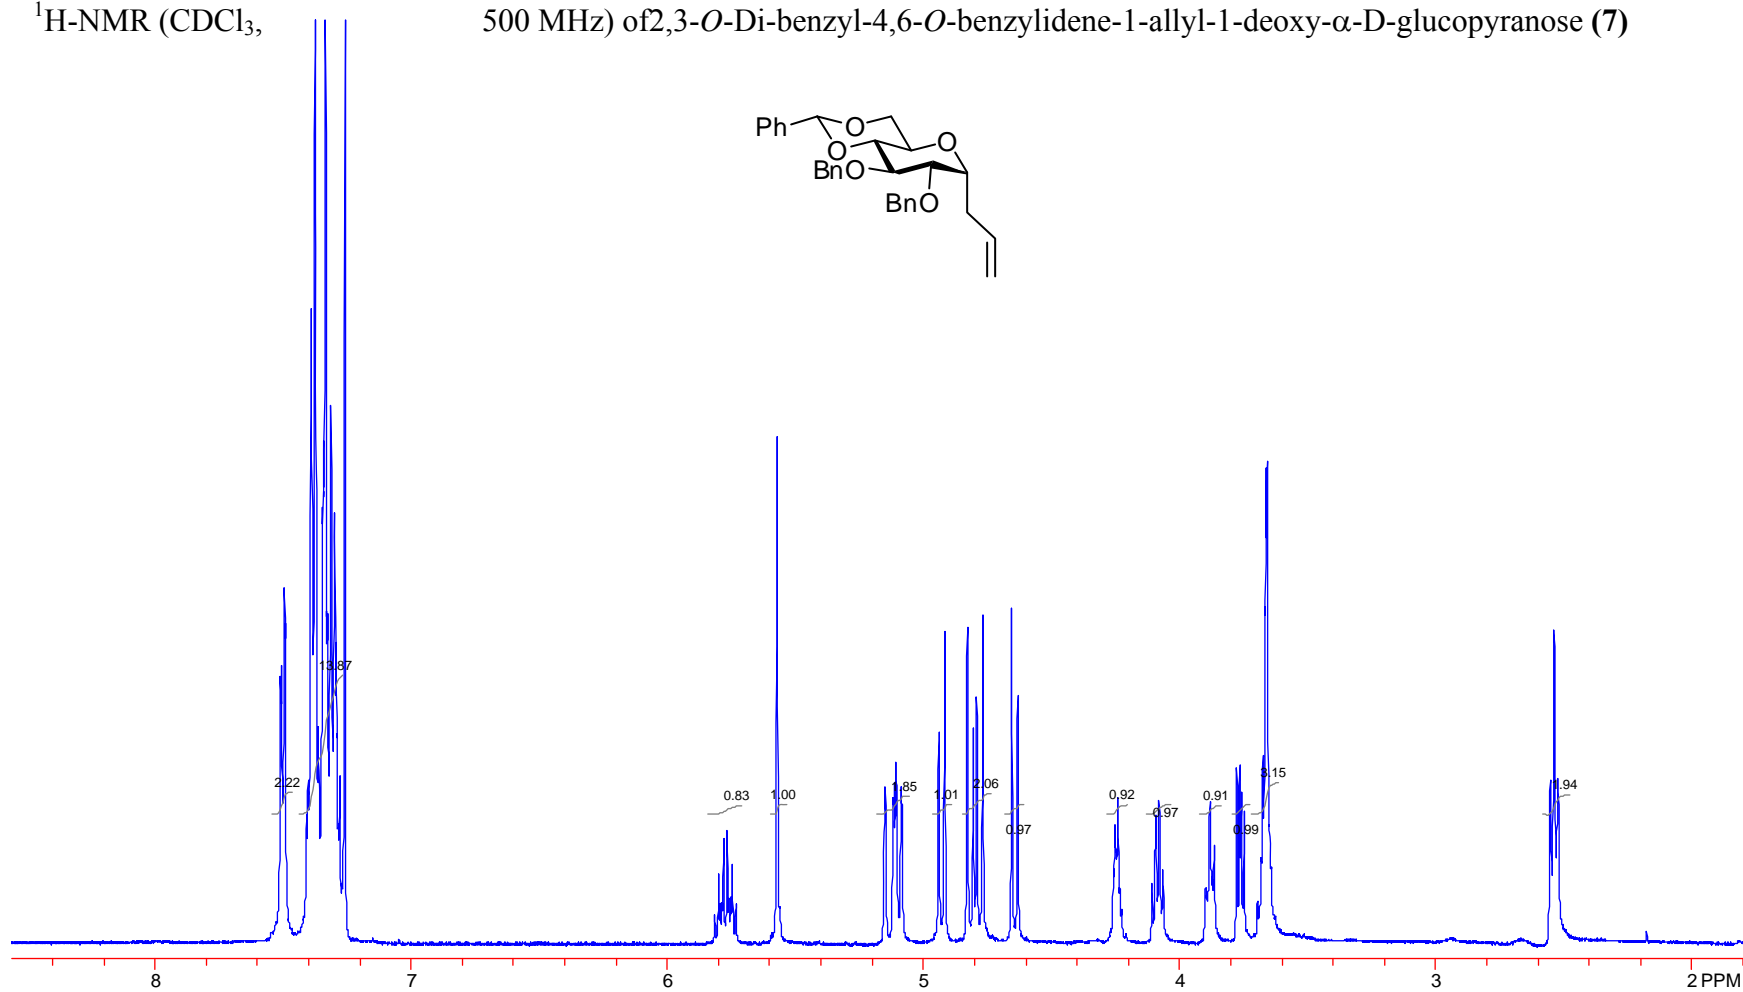

$^{13}\text{C}$ -NMR ( $\text{CDCl}_3$ , 125 MHz) of 2,3-*O*-Di-benzyl-4,6-*O*-benzylidene-1-allyl-1-deoxy- $\alpha$ -D-glucopyranose (7)

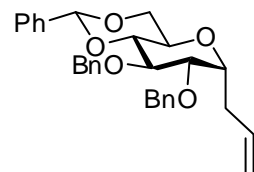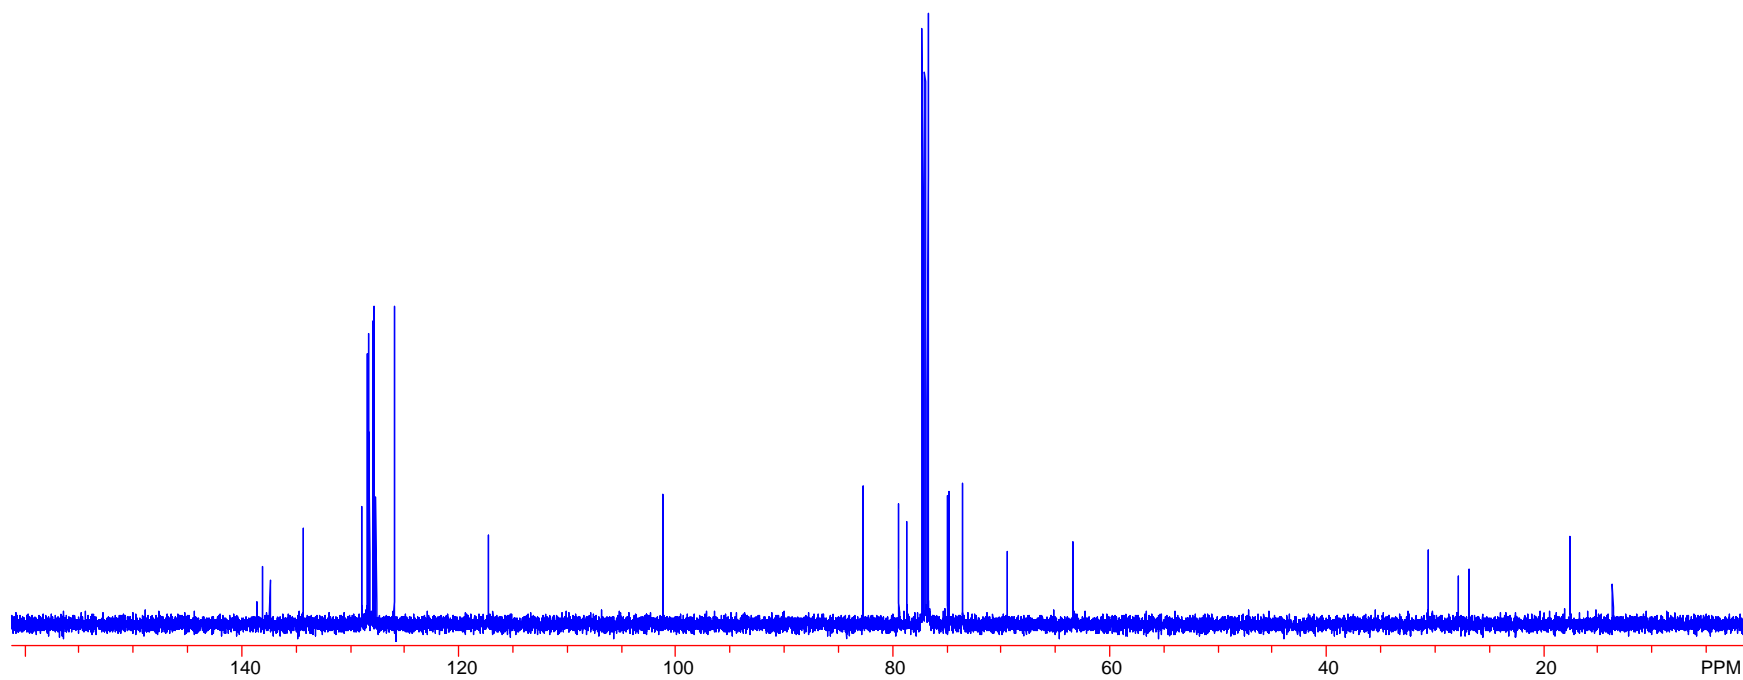



$^1\text{H-NMR}$  ( $\text{CDCl}_3$ , 500 MHz) of 2,3-Di-*O*-benzyl-4,6-*O*-benzylidene-1-(2-oxo-2-phenylethyl)- $\alpha$ -D-glucopyranose (**8**)

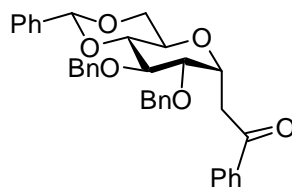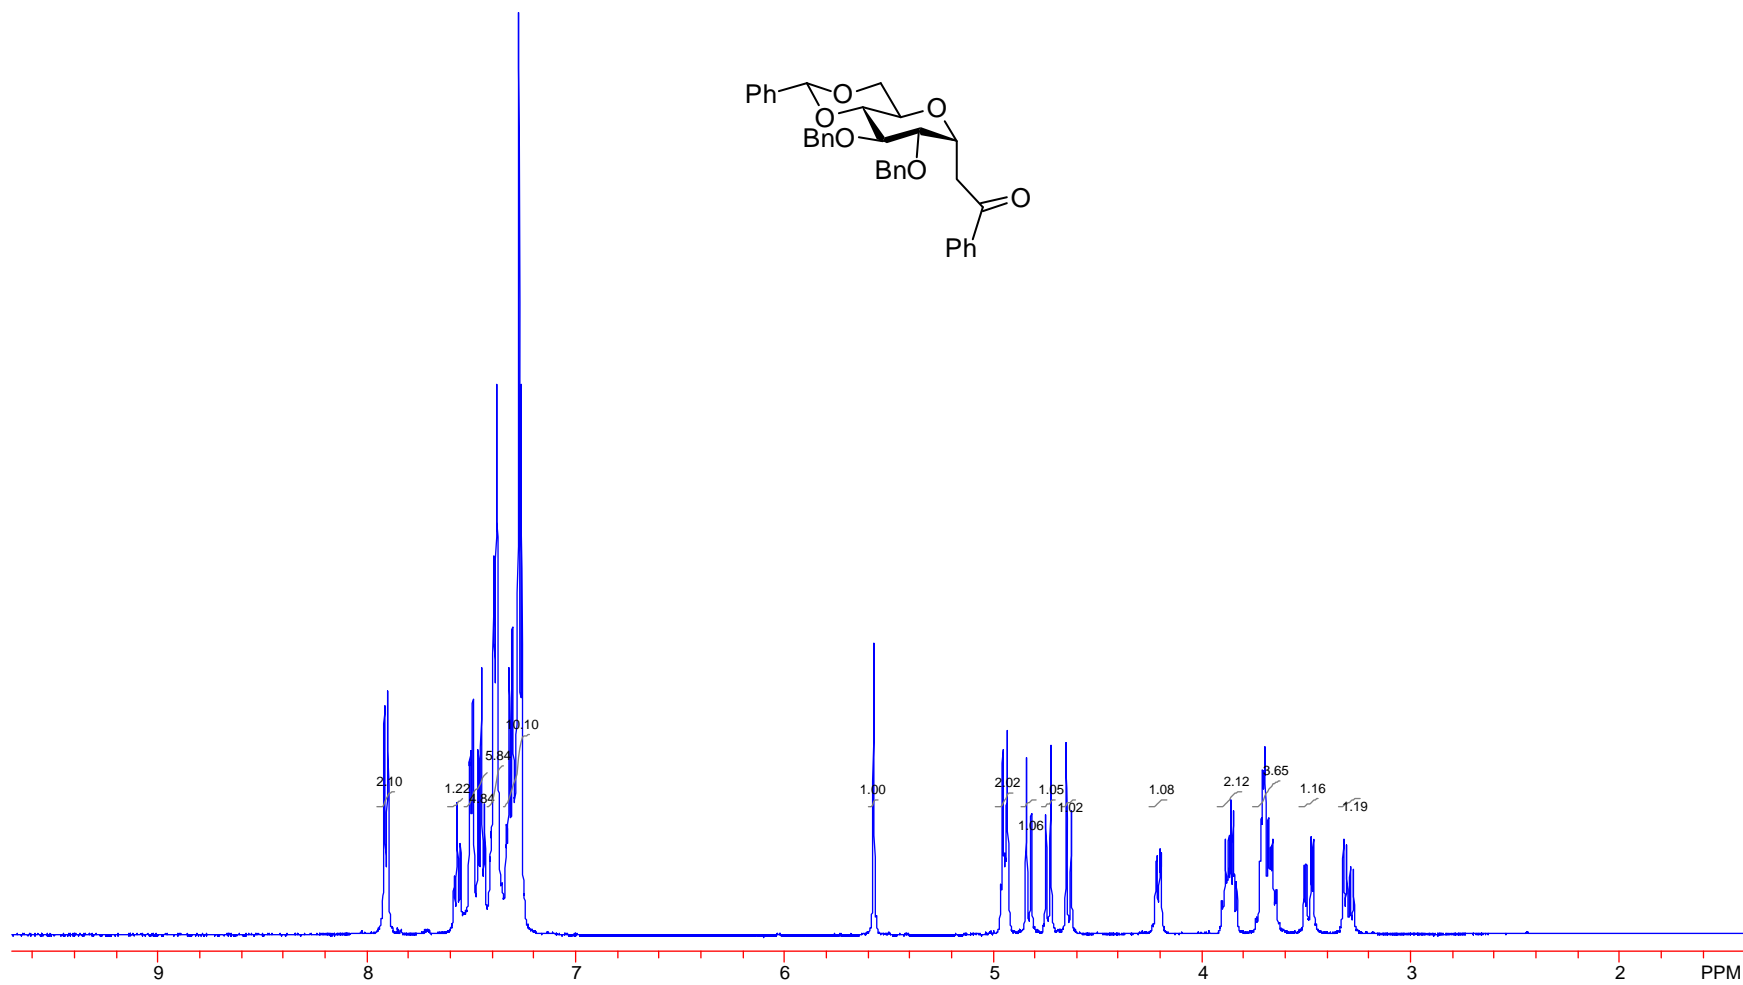

$^{13}\text{C}$ -NMR ( $\text{CDCl}_3$ , 125 MHz) 2,3-Di-*O*-benzyl-4,6-*O*-benzylidene-1-(2-oxo-2-phenylethyl)- $\alpha$ -D-glucopyranose (**8**)

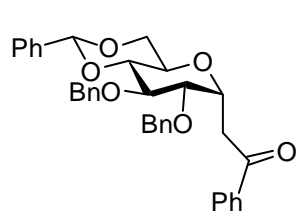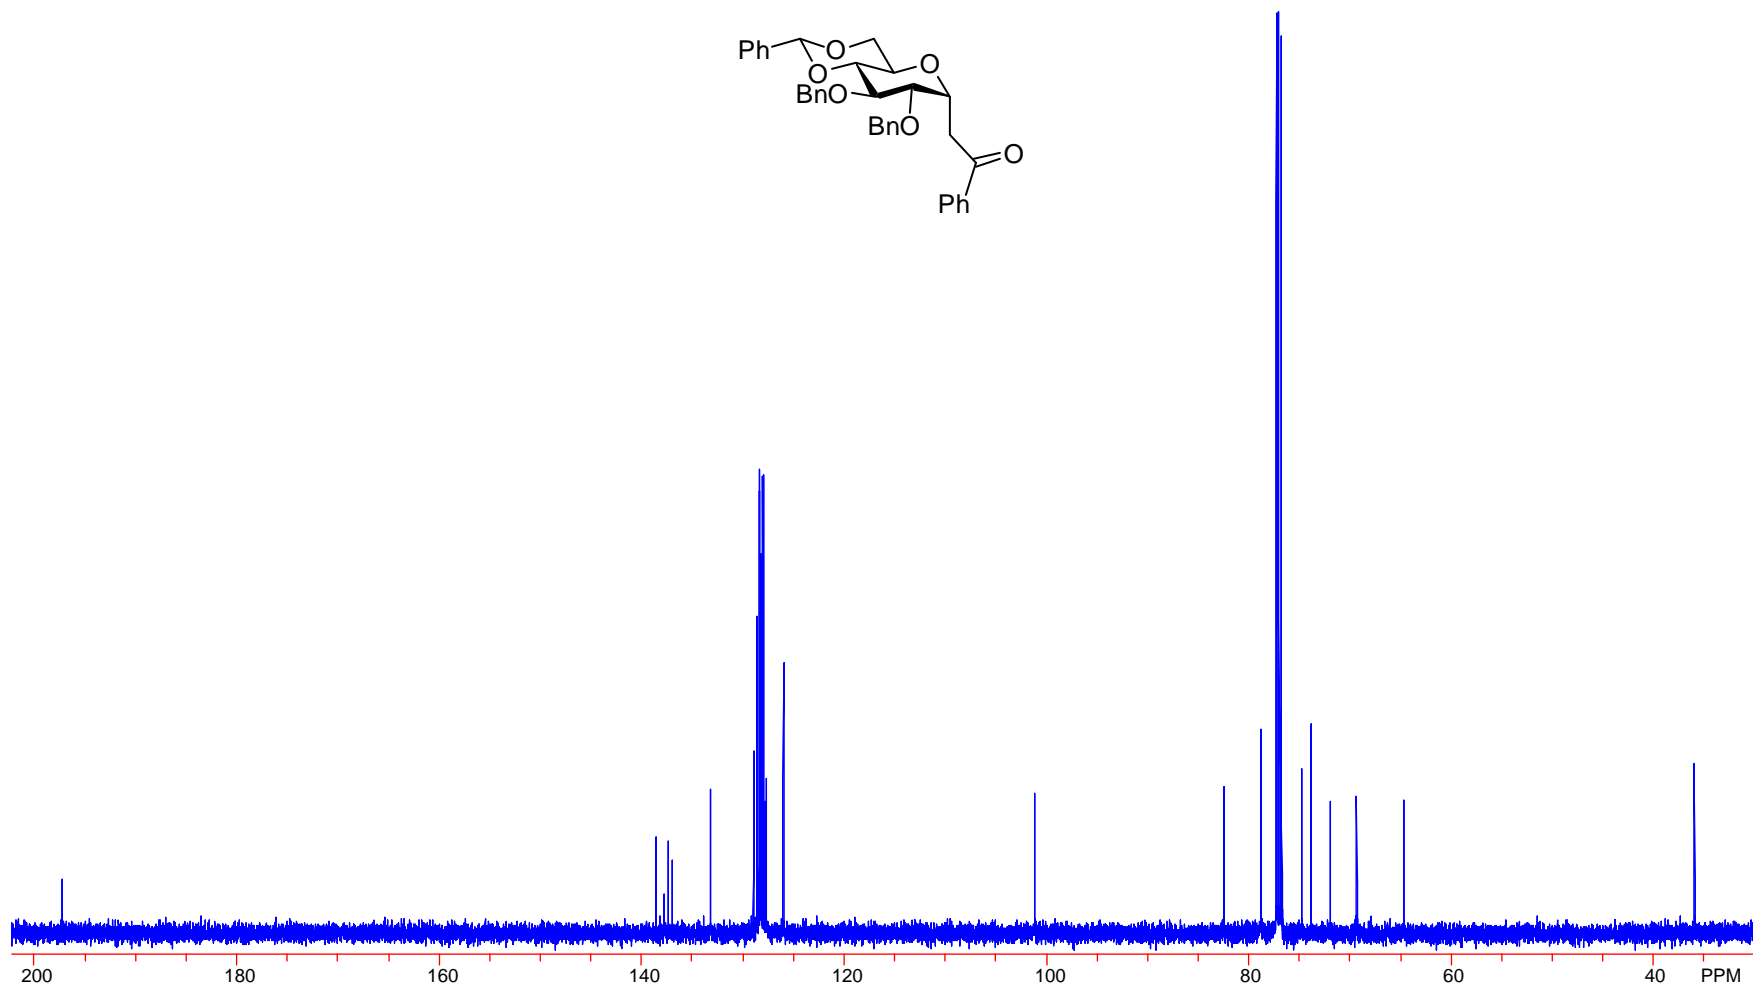

$^1\text{H-NMR}$  ( $\text{CDCl}_3$ , 500 MHz) of [(1*R*)-2-Oxo-1,2-diphenyl-1-(phenylthiomethyl)ethyl] 2,3-di-*O*-benzyl-4,6-*O*-benzylidene- $\alpha$ -D-glucopyranoside (**9**)

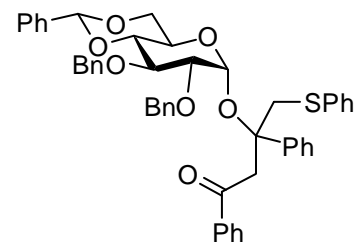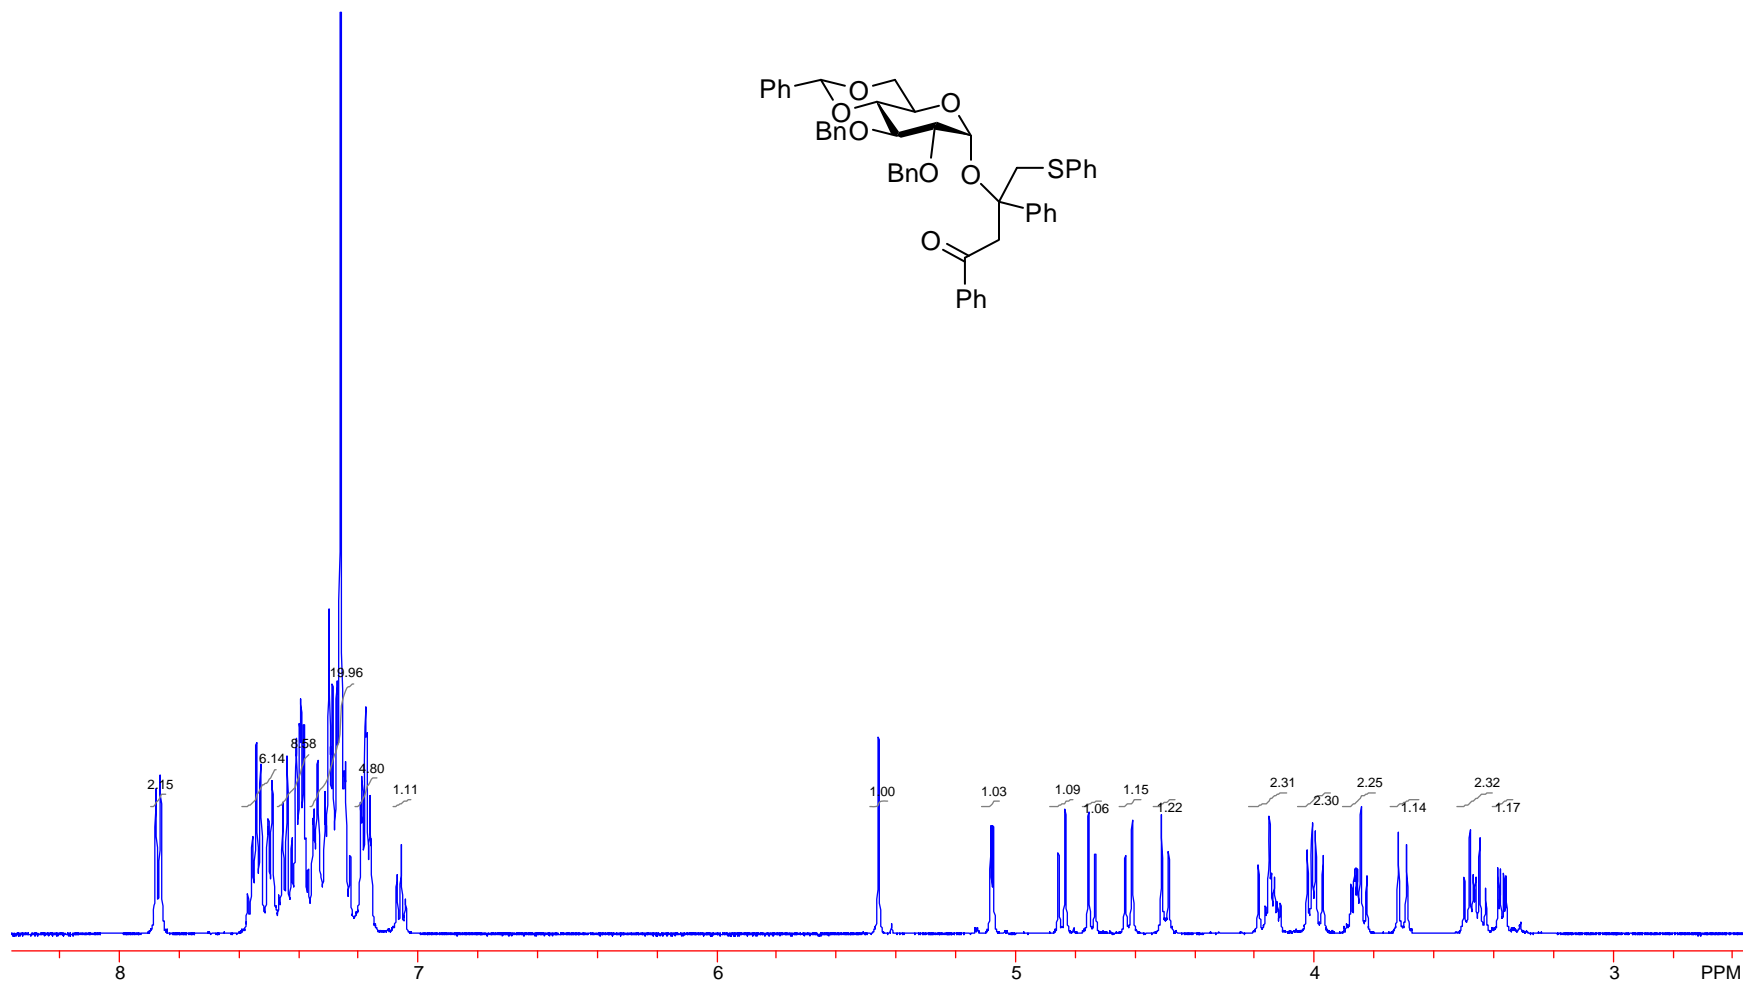

$^{13}\text{C}$ -NMR ( $\text{CDCl}_3$ , 125 MHz) of [(1*R*)-2-Oxo-1,2-diphenyl-1-(phenylthiomethyl)ethyl] 2,3-di-*O*-benzyl-4,6-*O*-benzylidene- $\alpha$ -D-glucopyranoside (**9**)

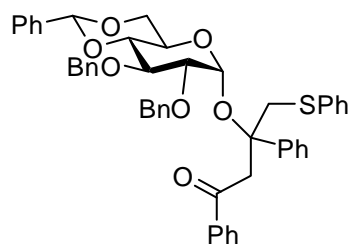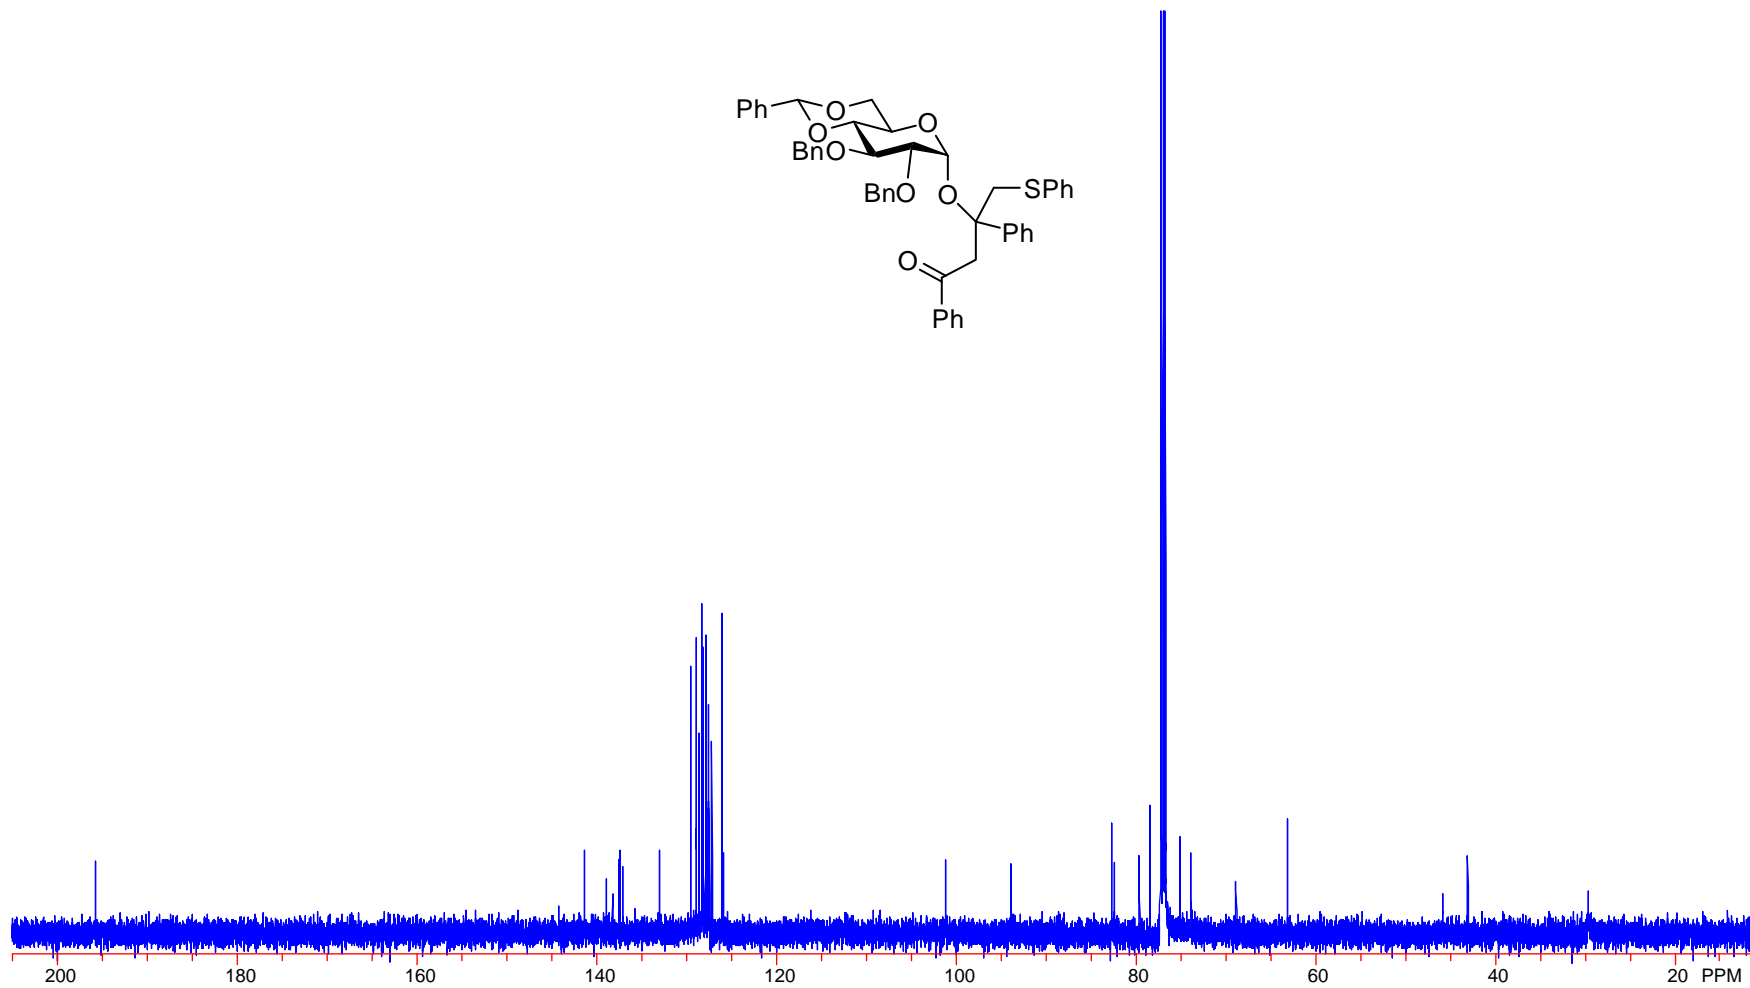

<sup>1</sup>H-NMR (CDCl<sub>3</sub>, 500 MHz) of 2-*O*-Benzyl-4,6-*O*-benzylidene-1-allyl-1,3-dideoxy- β-D-mannopyranose (**10**)

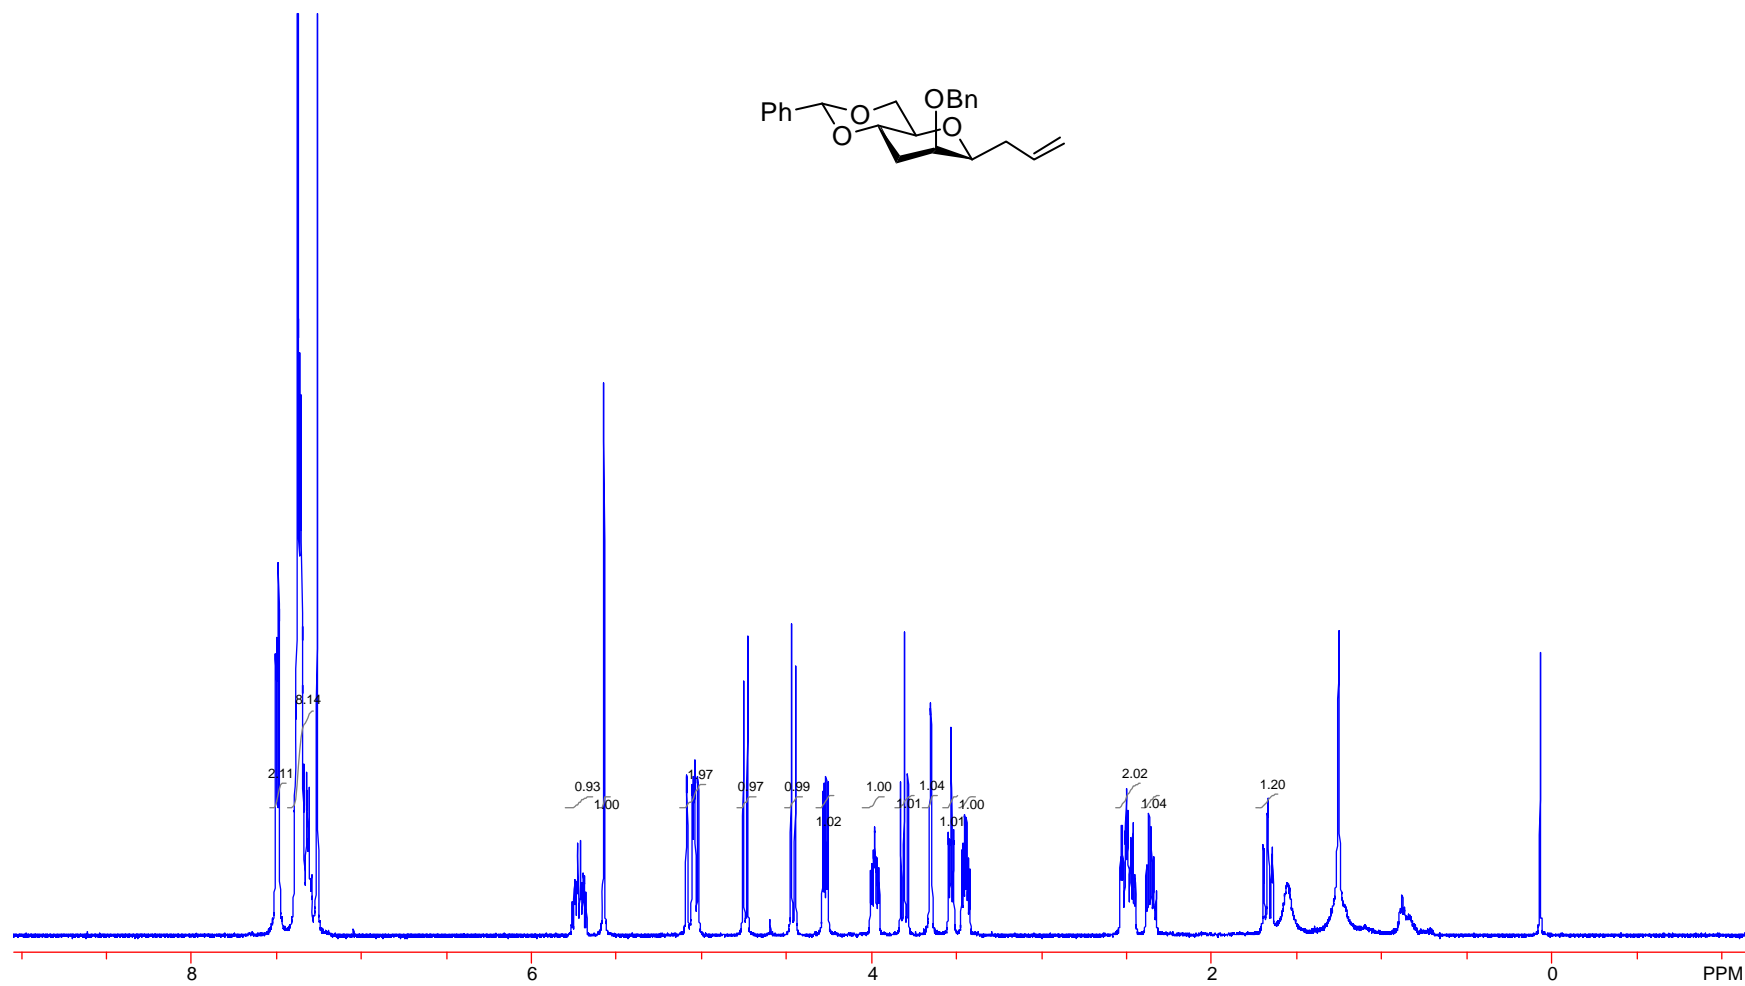

$^{13}\text{C}$ -NMR ( $\text{CDCl}_3$ , 125 MHz) of 2-*O*-Benzyl-4,6-*O*-benzylidene-1-allyl-1,3-dideoxy- $\beta$ -D-mannopyranose (**10**)

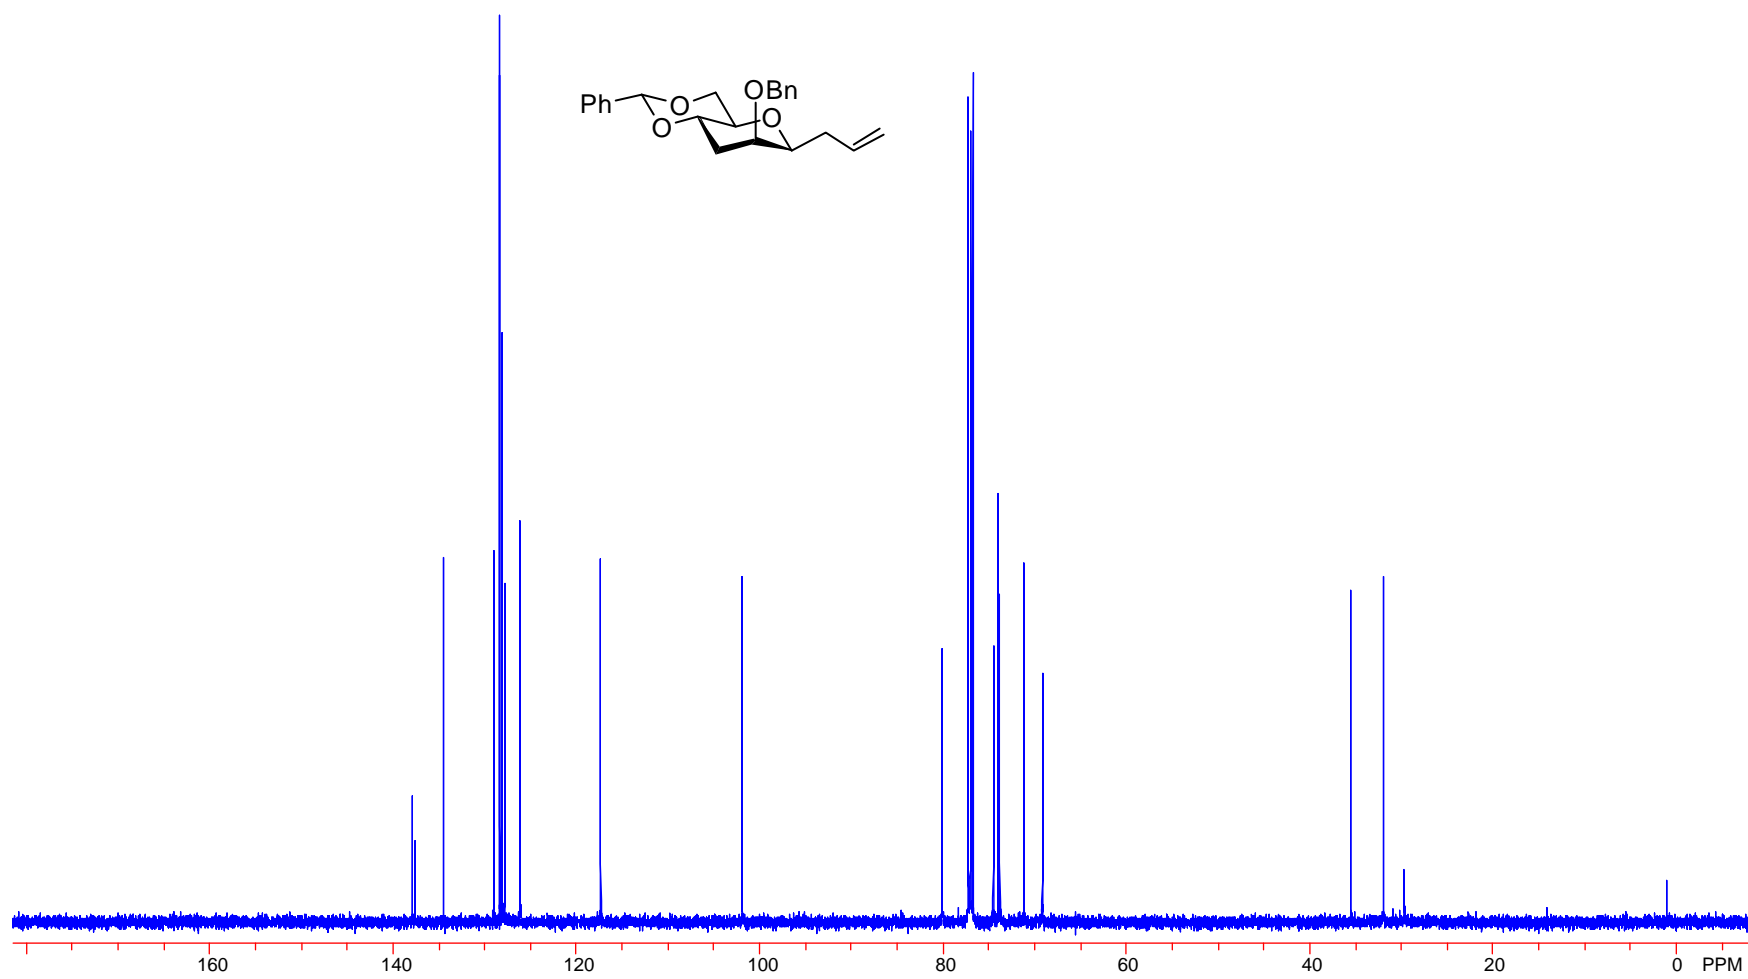

$^1\text{H-NMR}$  ( $\text{CDCl}_3$ , 500 MHz) of *S*-Phenyl 2-*O*-Benzyl-4,6-*O*-benzylidene-3-deoxy- $\alpha$ -D-thio-mannopyranoside (**3a**)

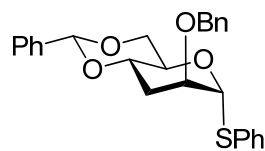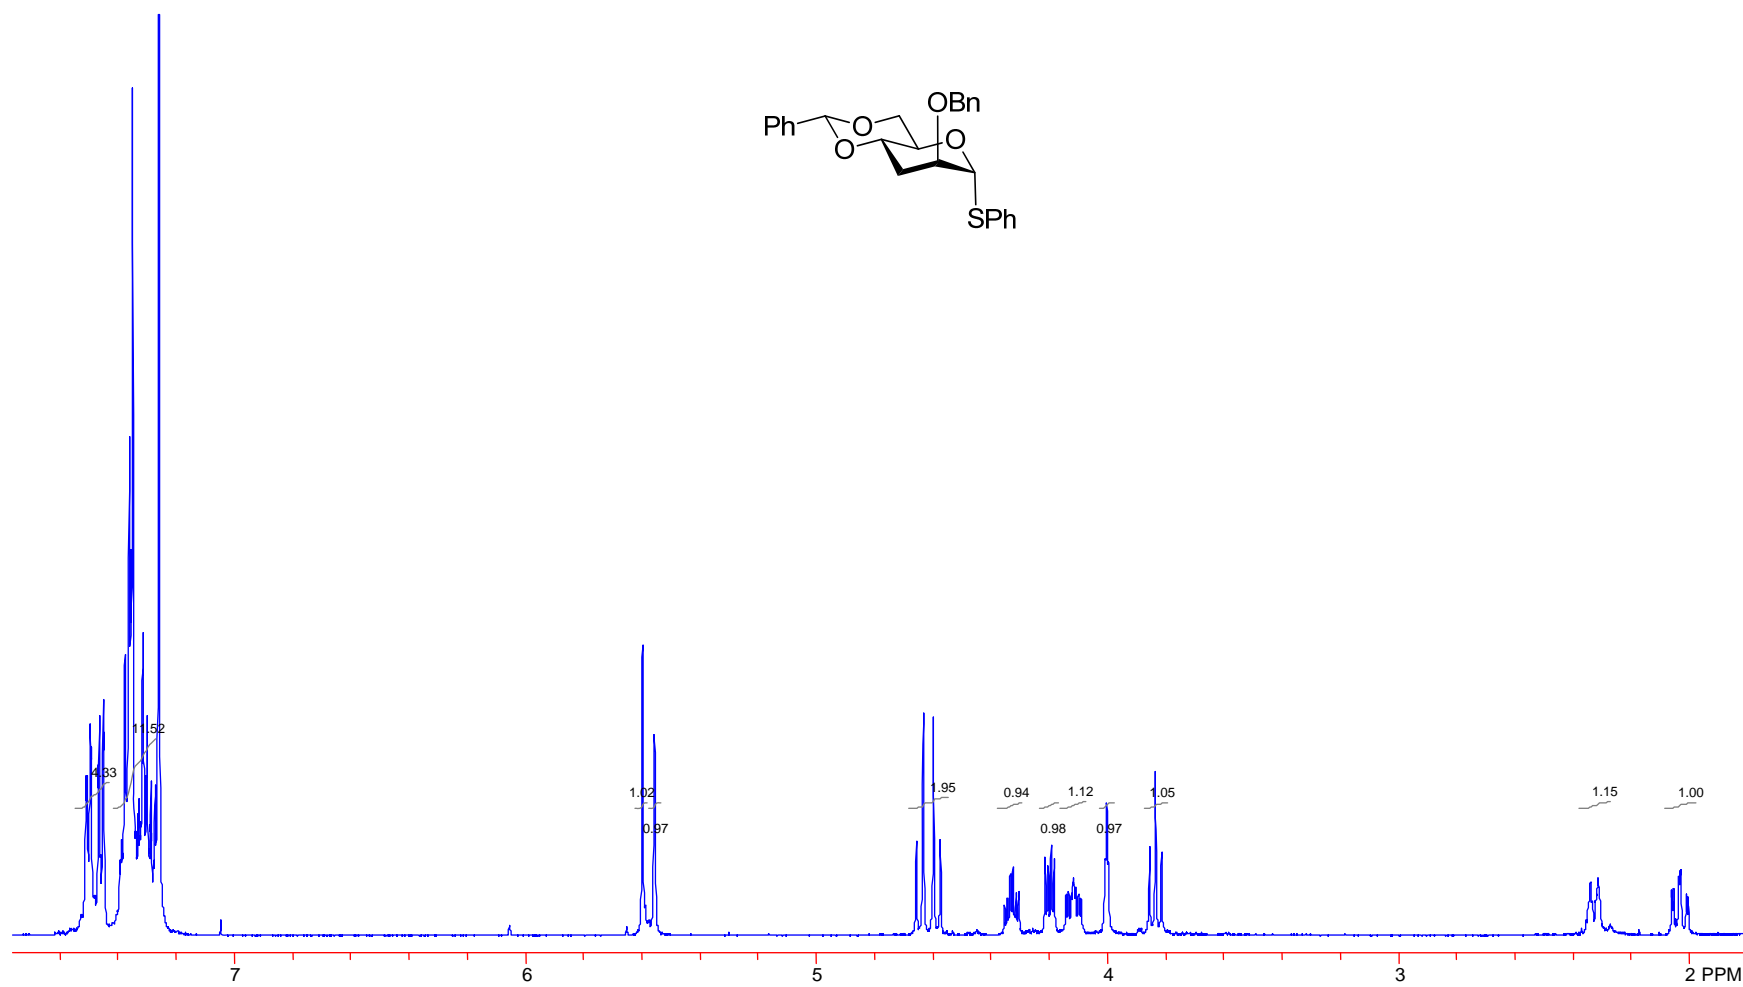

$^{13}\text{C}$ -NMR ( $\text{CDCl}_3$ , 125 MHz) of *S*-Phenyl 2-*O*-Benzyl-4,6-*O*-benzylidene-3-deoxy- $\alpha$ -D-thio-mannopyranoside (**3a**)

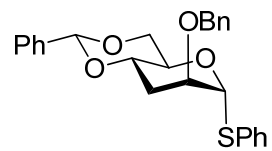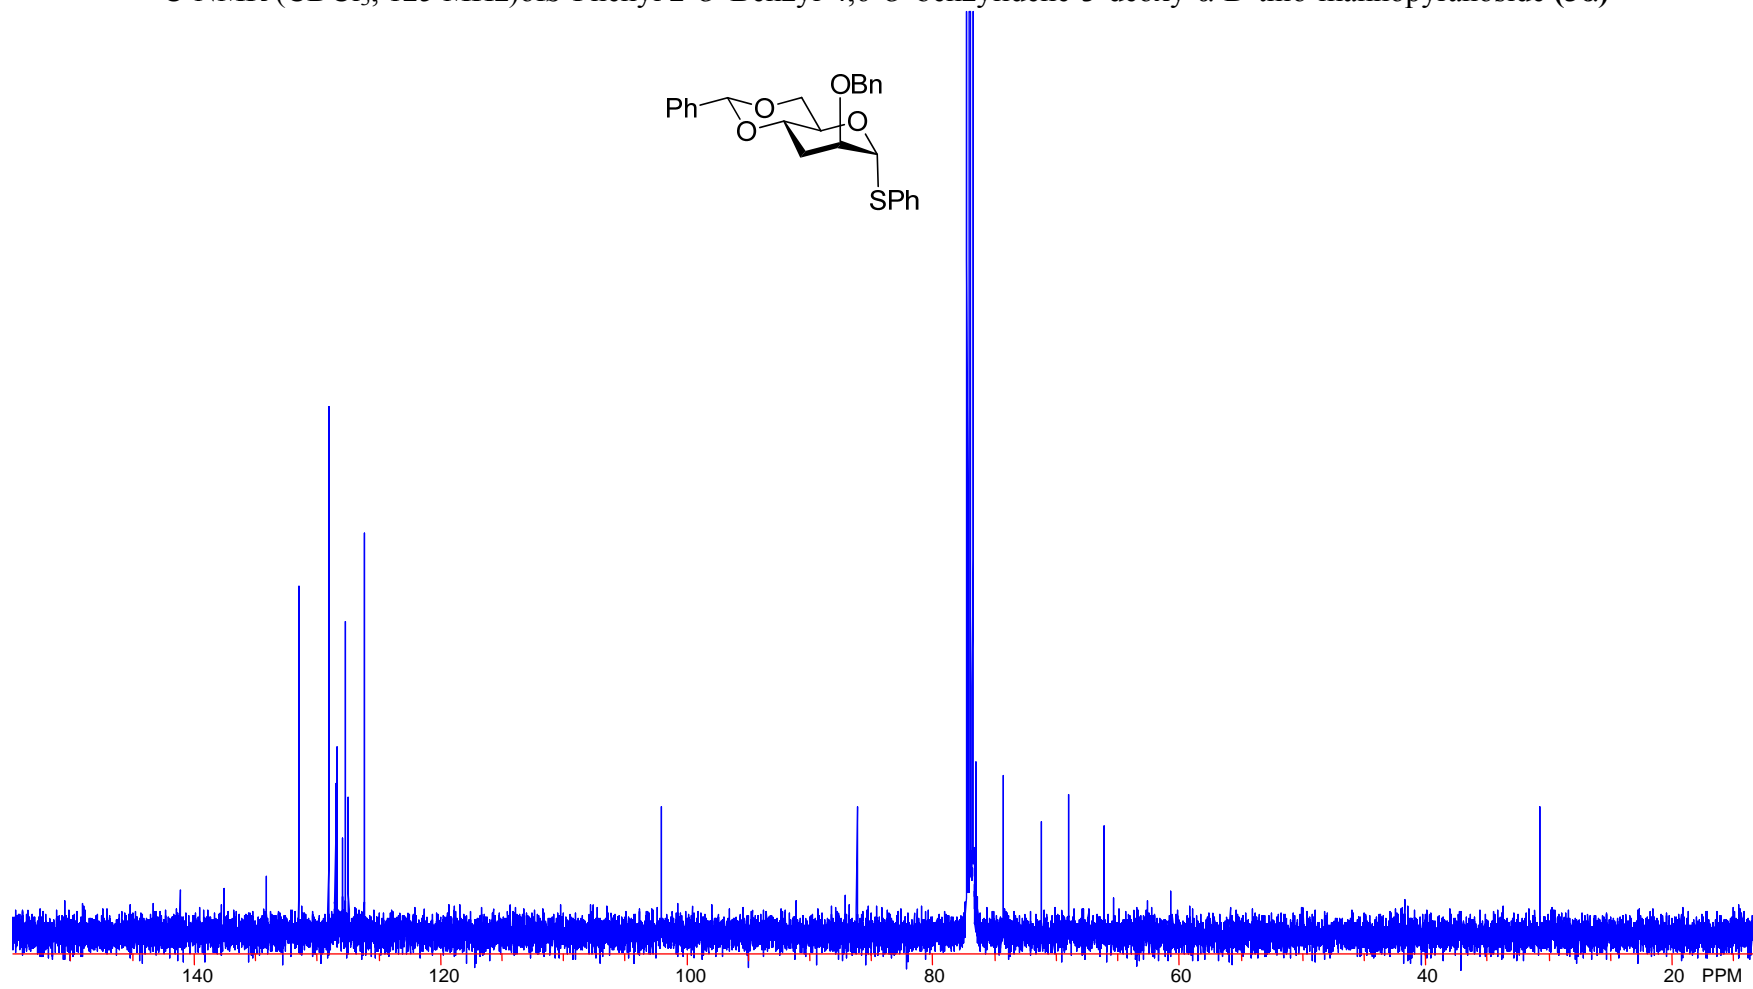



$^1\text{H-NMR}$  ( $\text{CDCl}_3$ , 500 MHz) of 2-*O*-Benzyl-4,6-*O*-benzylidene-1,3-dideoxy-1-(2-oxo-2-phenylethyl)-  $\beta$ -D-mannopyranose (**11**)

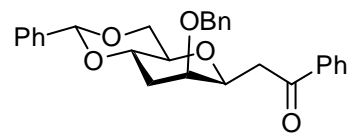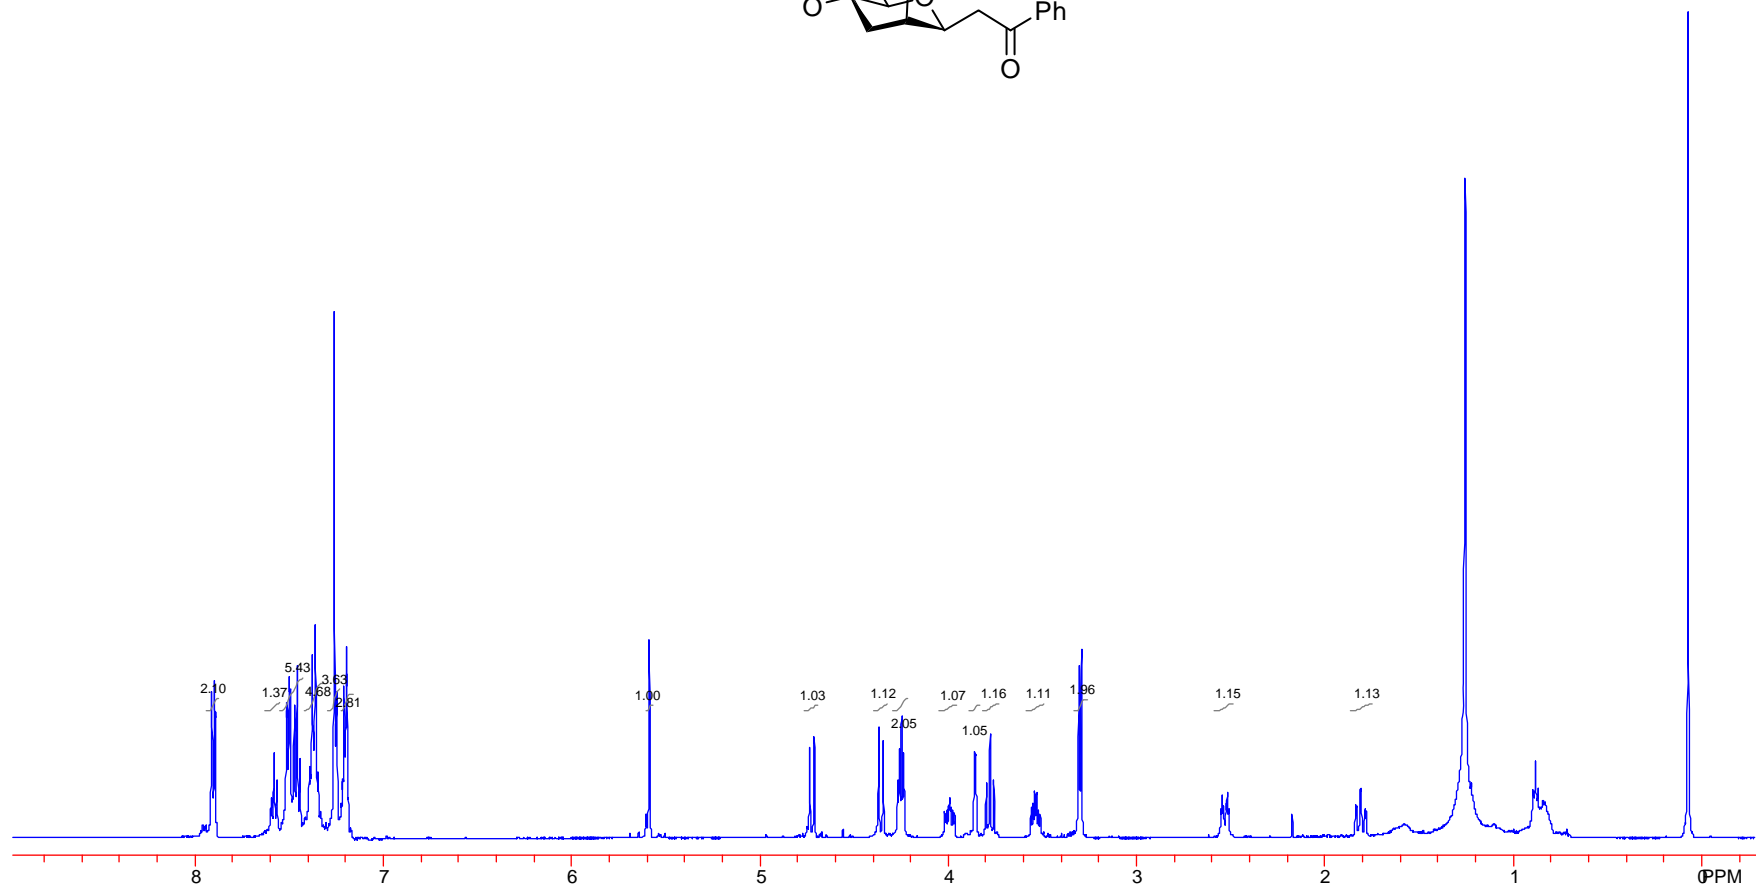

$^{13}\text{C}$ -NMR ( $\text{CDCl}_3$ , 125 MHz) of 2-*O*-Benzyl-4,6-*O*-benzylidene-1,3-dideoxy-1-(2-oxo-2-phenylethyl)- $\beta$ -D-mannopyranose (**11**)

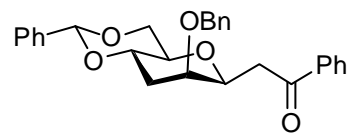

$^1\text{H-NMR}$  ( $\text{CDCl}_3$ , 500 MHz) of 2-*O*-Benzyl-4,6-*O*-benzylidene-1-allyl-1,3-dideoxy- $\alpha$ -D-glucopyranose (**12**)

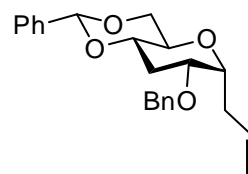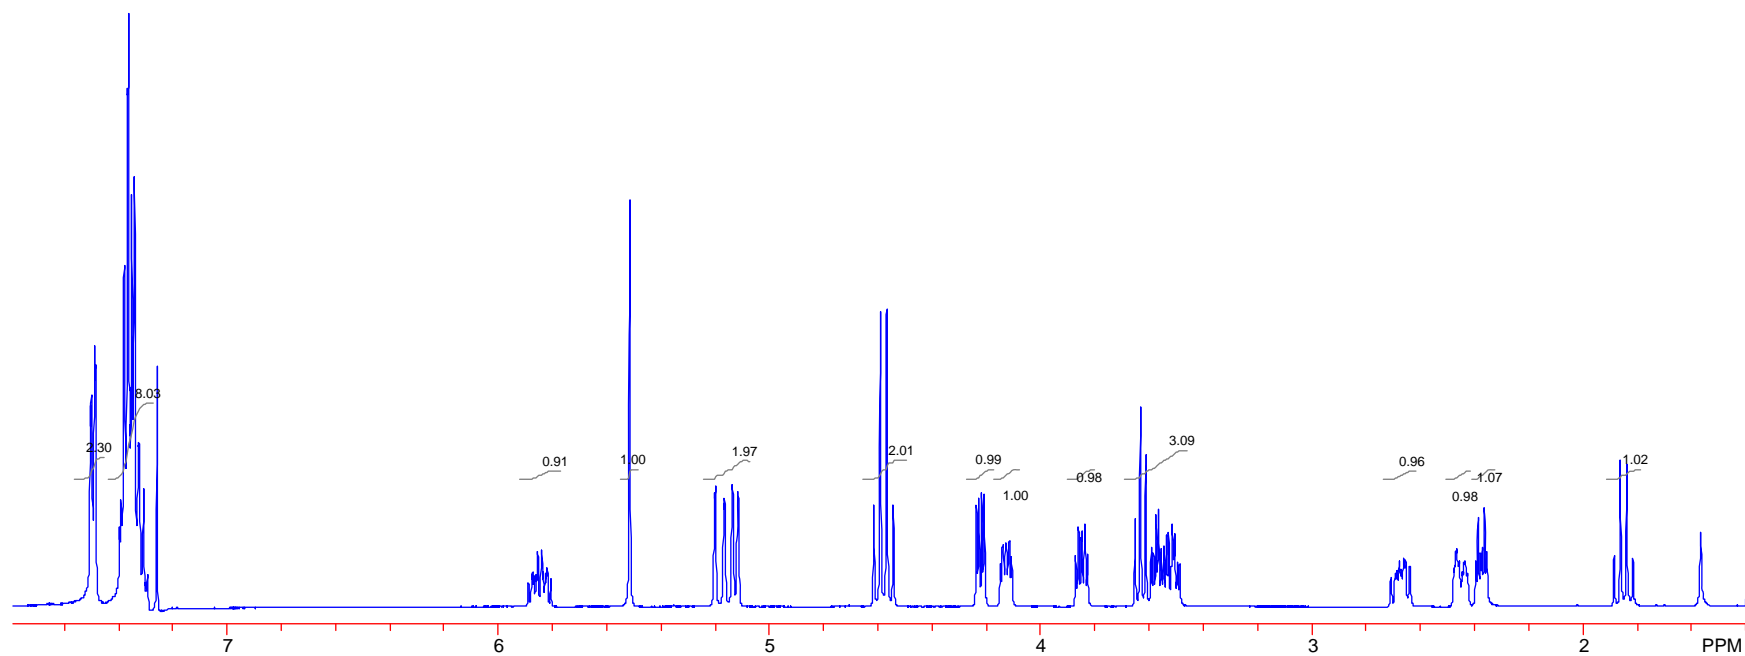

$^{13}\text{C}$ -NMR ( $\text{CDCl}_3$ , 125 MHz) of 2-*O*-Benzyl-4,6-*O*-benzylidene-1-allyl-1,3-dideoxy- $\alpha$ -D-glucopyranose (**12**)

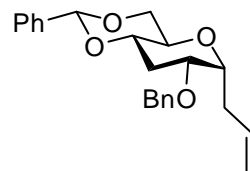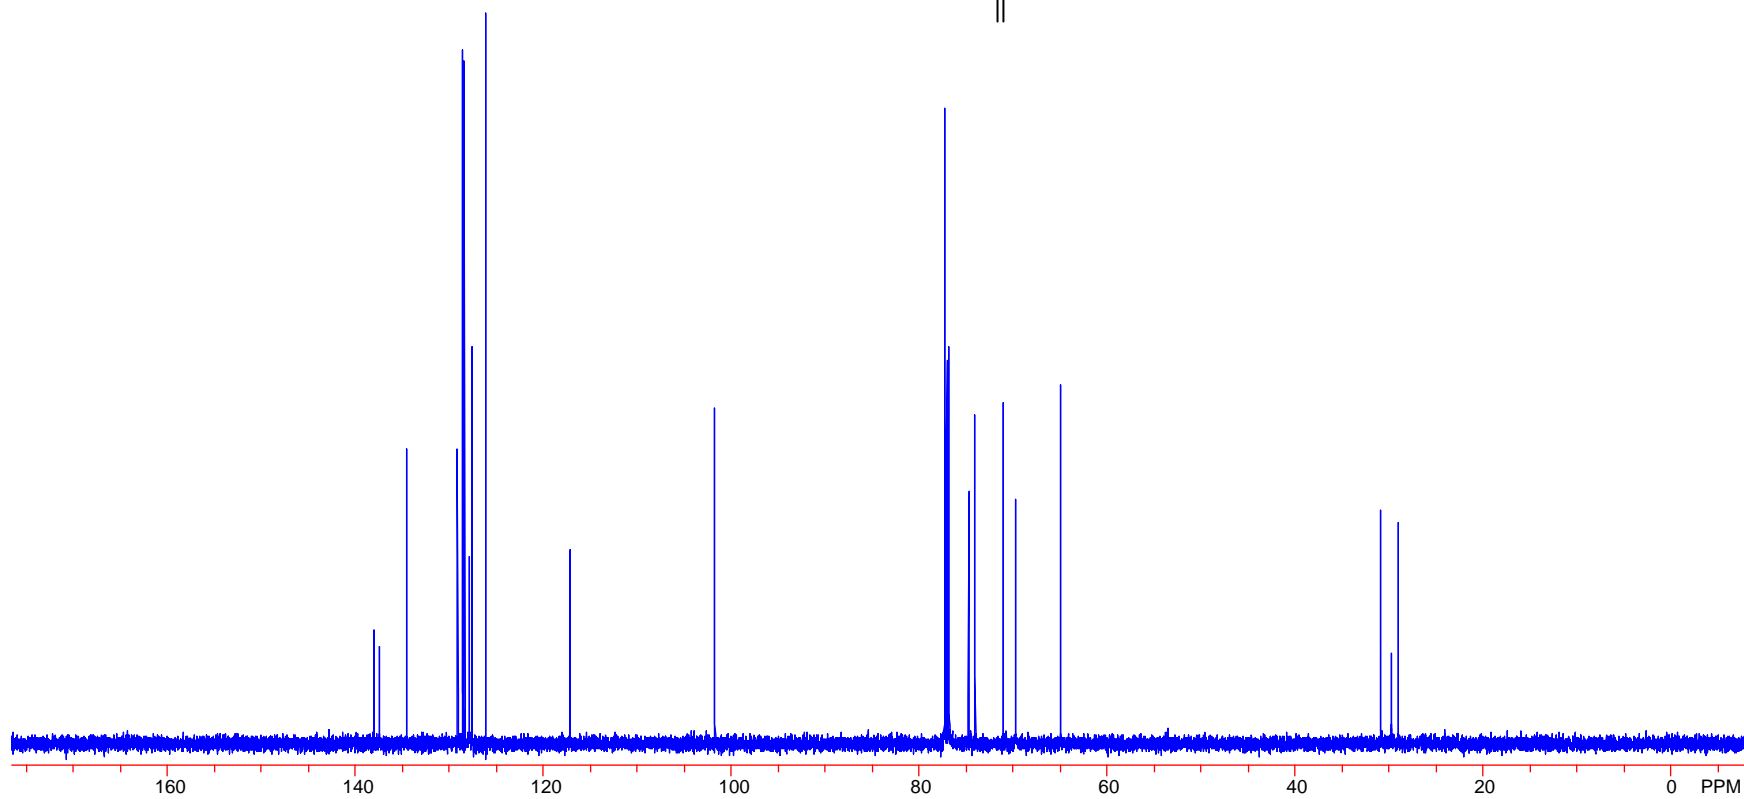

$^1\text{H-NMR}$  ( $\text{CDCl}_3$ , 500 MHz) of 2-*O*-Benzyl-4,6-*O*-benzylidene-3-deoxy-1-(2-oxo-2-phenylethyl)- $\alpha$ -D-glucopyranose(**13**)

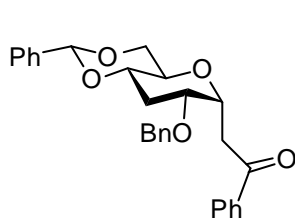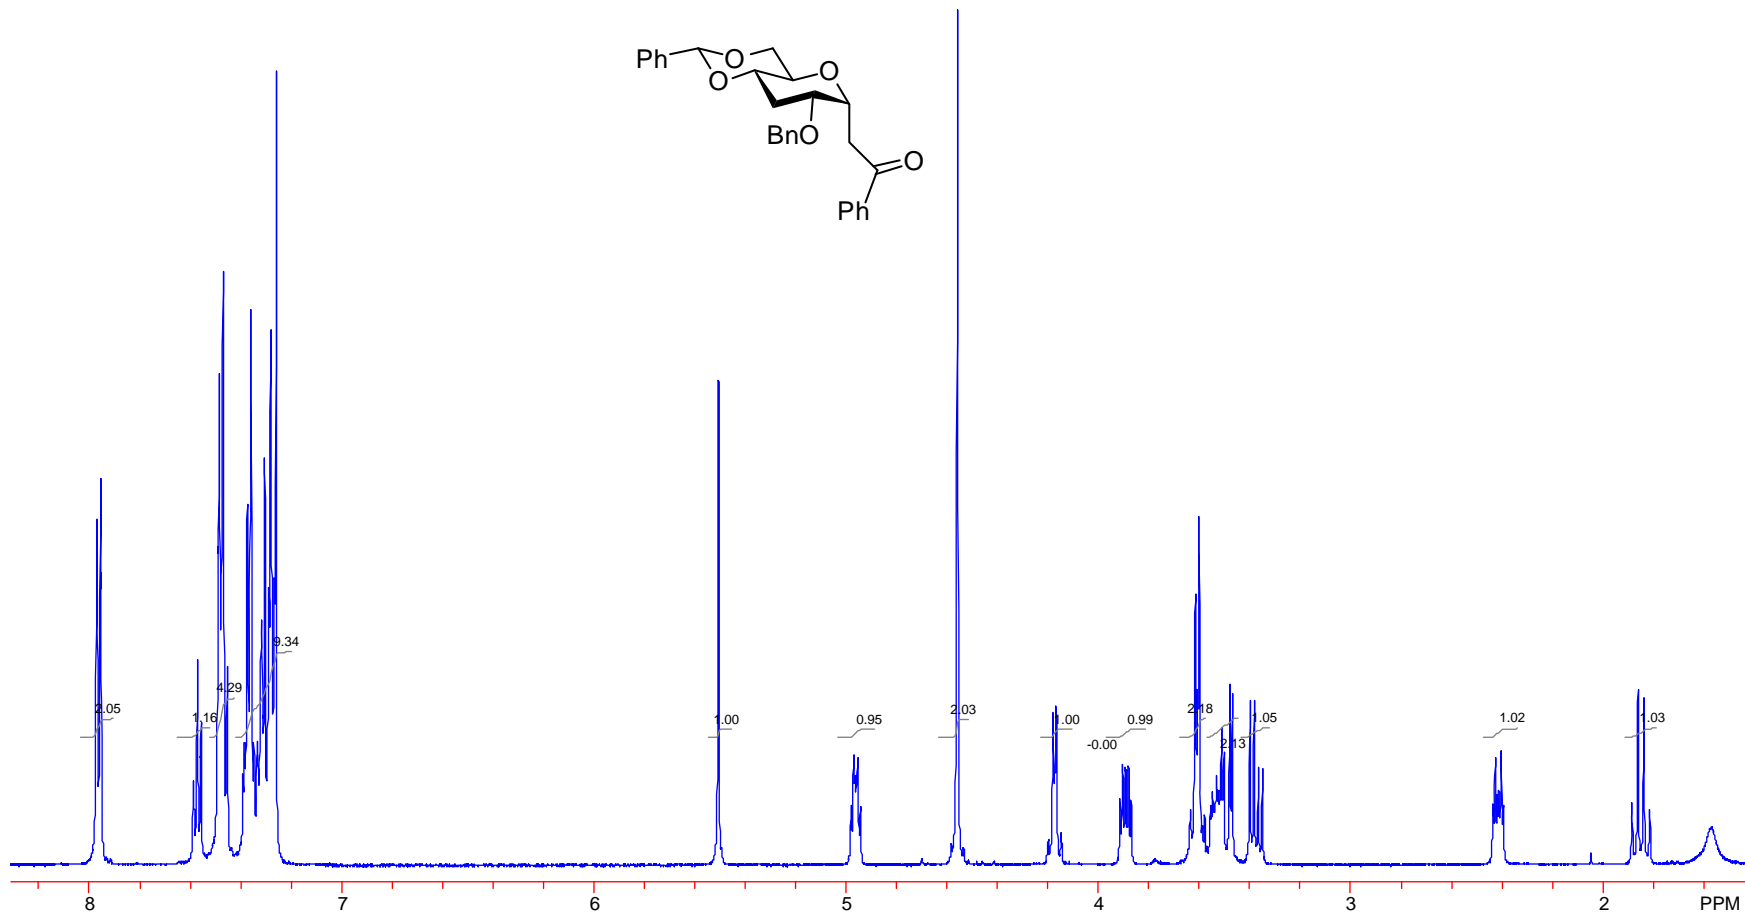

$^{13}\text{C}$ -NMR ( $\text{CDCl}_3$ , 125 MHz) of 2-*O*-Benzyl-4,6-*O*-benzylidene-3-deoxy-1-(2-oxo-2-phenylethyl)- $\alpha$ -D-glucopyranose(**13**)

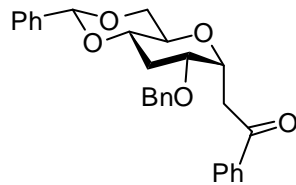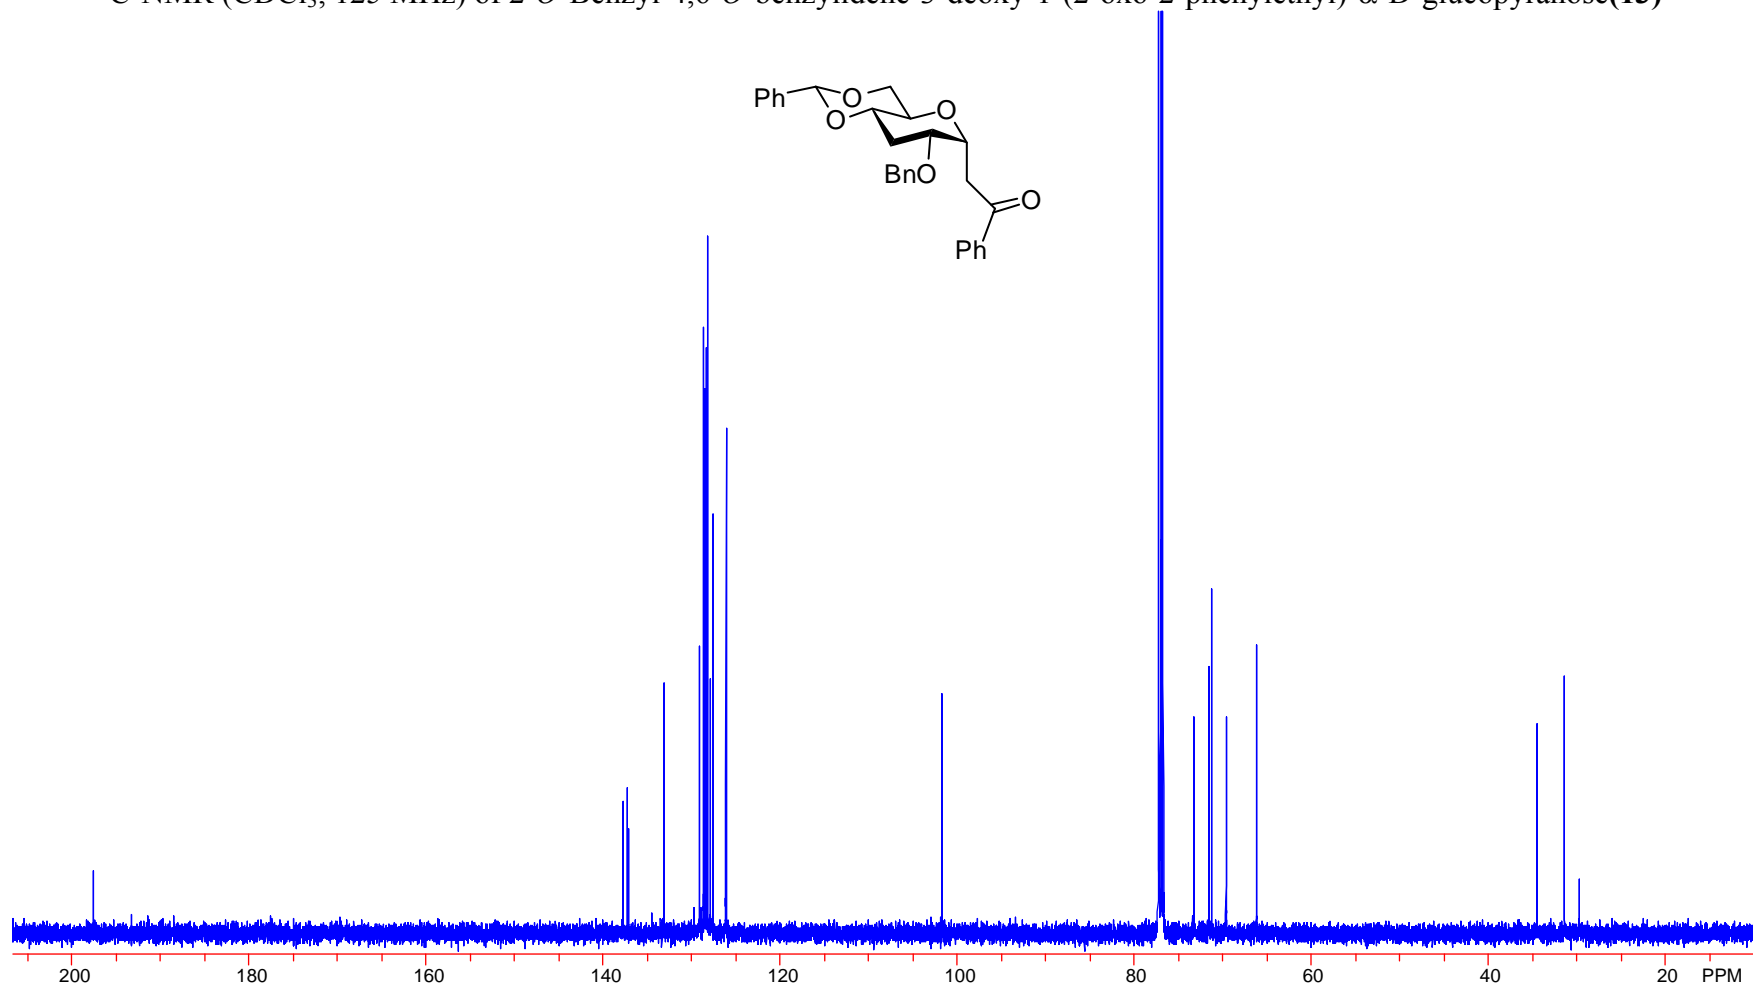

$^1\text{H-NMR}$  ( $\text{CDCl}_3$ , 500 MHz) of [(1*R*)-2-Oxo-1,2-diphenyl-1-(phenylthiomethyl)ethyl] 2-*O*-benzyl-4,6-*O*-benzylidene-3-deoxy- $\alpha$ -D-glucopyranoside (**14**)

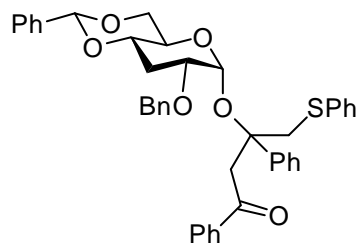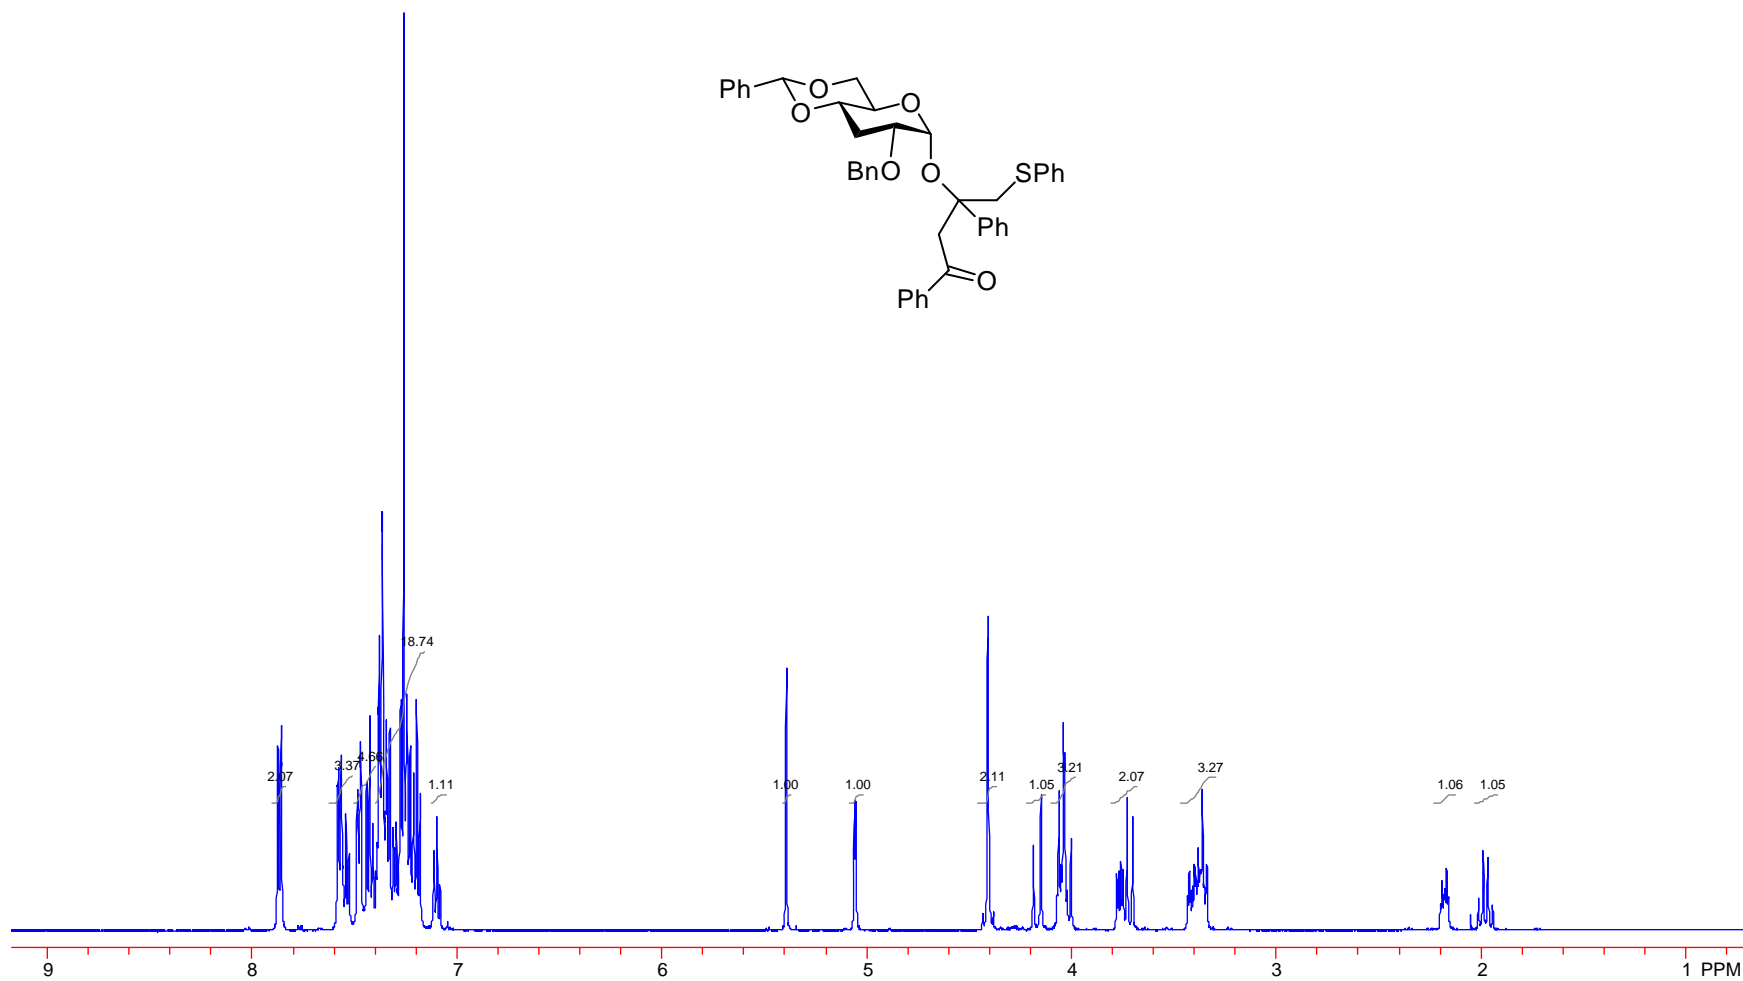

$^{13}\text{C}$ -NMR ( $\text{CDCl}_3$ , 125 MHz) of [(1*R*)-2-Oxo-1,2-diphenyl-1-(phenylthiomethyl)ethyl] 2-*O*-benzyl-4,6-*O*-benzylidene-3-deoxy- $\alpha$ -D-glucopyranoside (**14**)

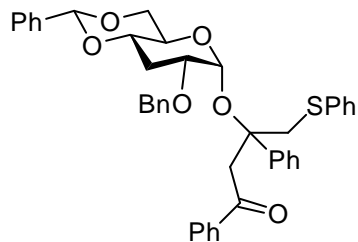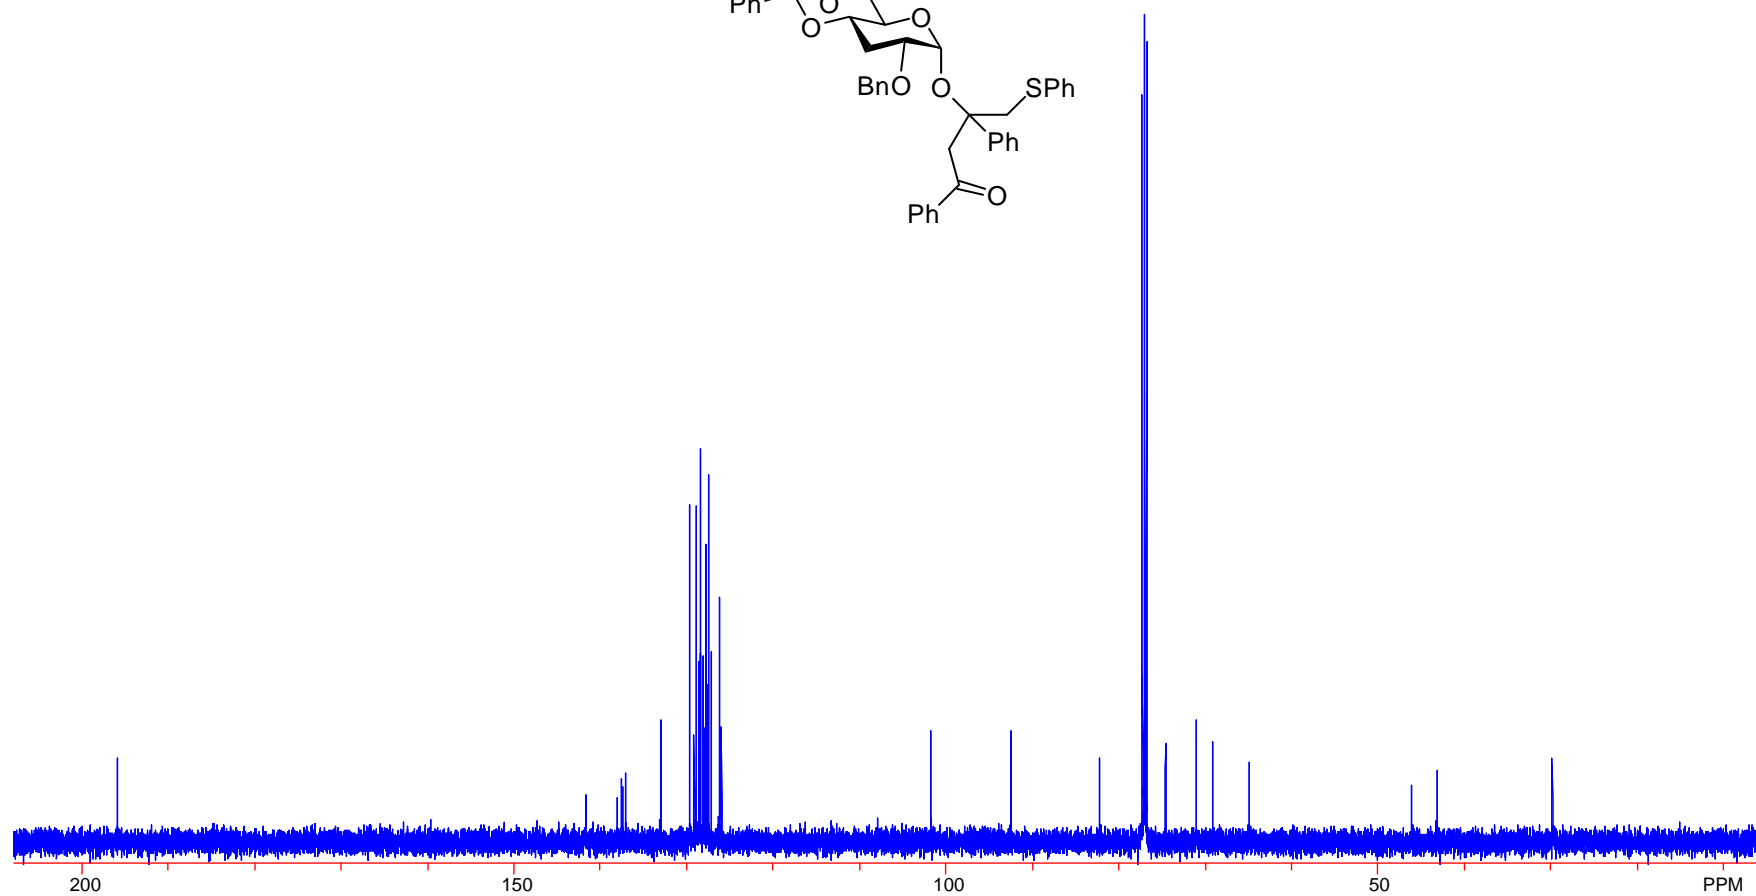

Supplement: NIHMS411114-supplement-1_si_001.pdf [file NIHMS411114-supplement-1_si_001.pdf]
